# Supplementary material for: Metal-Free Synthesis of 2-Substituted Quinazolines via Green Oxidation of o-Aminobenzylamines: Practical Construction of N-Containing Heterocycles Based on a Salicylic Acid-Catalyzed Oxidation System
Source: PubMed Central journal article supplement (PMC8905626; doi:10.3389/fchem.2021.822841), 2022-02-23

## Supporting Information

### Metal-Free Synthesis of 2-Substituted Quinazolines via Green Oxidation of *o*-Aminobenzylamines: Practical Construction of *N*-Containing Heterocycles Based on a Salicylic Acid-Catalyzed Oxidation System

Yuki Yamamoto<sup>1</sup>, Chihiro Yamakawa<sup>1</sup>, Riku Nishimura<sup>1</sup>, Chun-ping Dong<sup>1</sup>,

Shintaro Kodama<sup>1\*</sup>, Akihiro Nomoto<sup>1</sup>, Michio Ueshima<sup>1</sup>, and Akiya Ogawa<sup>1\*</sup>

<sup>1</sup>Department of Applied Chemistry, Graduate School of Engineering, Osaka Prefecture University, 1-1 Gakuen-cho, Nakaku, Sakai, Osaka 599-8531, Japan

skodama@chem.osakafu-u.ac.jp, ogawa@chem.osakafu-u.ac.jp

#### CONTENTS

|                                                                                                                                         | Pages   |
|-----------------------------------------------------------------------------------------------------------------------------------------|---------|
| <b>Scheme S1.</b> Comparison of the E-factor of some alternative methods for synthesis of quinazolines and this work                    | S2      |
| <b>Figure S1.</b> <sup>1</sup> H NMR spectrum of crude <b>3aa</b> after the reaction (entry 17 in Table 1)                              | S3      |
| <b>Table S1.</b> Optimization of reaction conditions for salicylic acid-catalyzed oxidation of benzylamine to the corresponding imine   | S3      |
| Copies of <sup>1</sup> H and <sup>13</sup> C{ <sup>1</sup> H} NMR spectra of compounds <b>3aa–3ah</b> , <b>3aj–3at</b> , and <b>3ba</b> | S4–S23  |
| Copies of <sup>1</sup> H and <sup>13</sup> C{ <sup>1</sup> H} NMR spectra of compounds <b>4a–4d</b>                                     | S24–S27 |
| Copies of <sup>1</sup> H and <sup>13</sup> C{ <sup>1</sup> H} NMR spectra of compounds <b>6a–6e</b> , <b>8</b> , and <b>9</b>           | S28–S34 |

## Scheme S1. Comparison of the E-factor of some alternative methods for synthesis of quinazolines and this work

(a) Previously reported methods for synthesis of quinazolines from amines

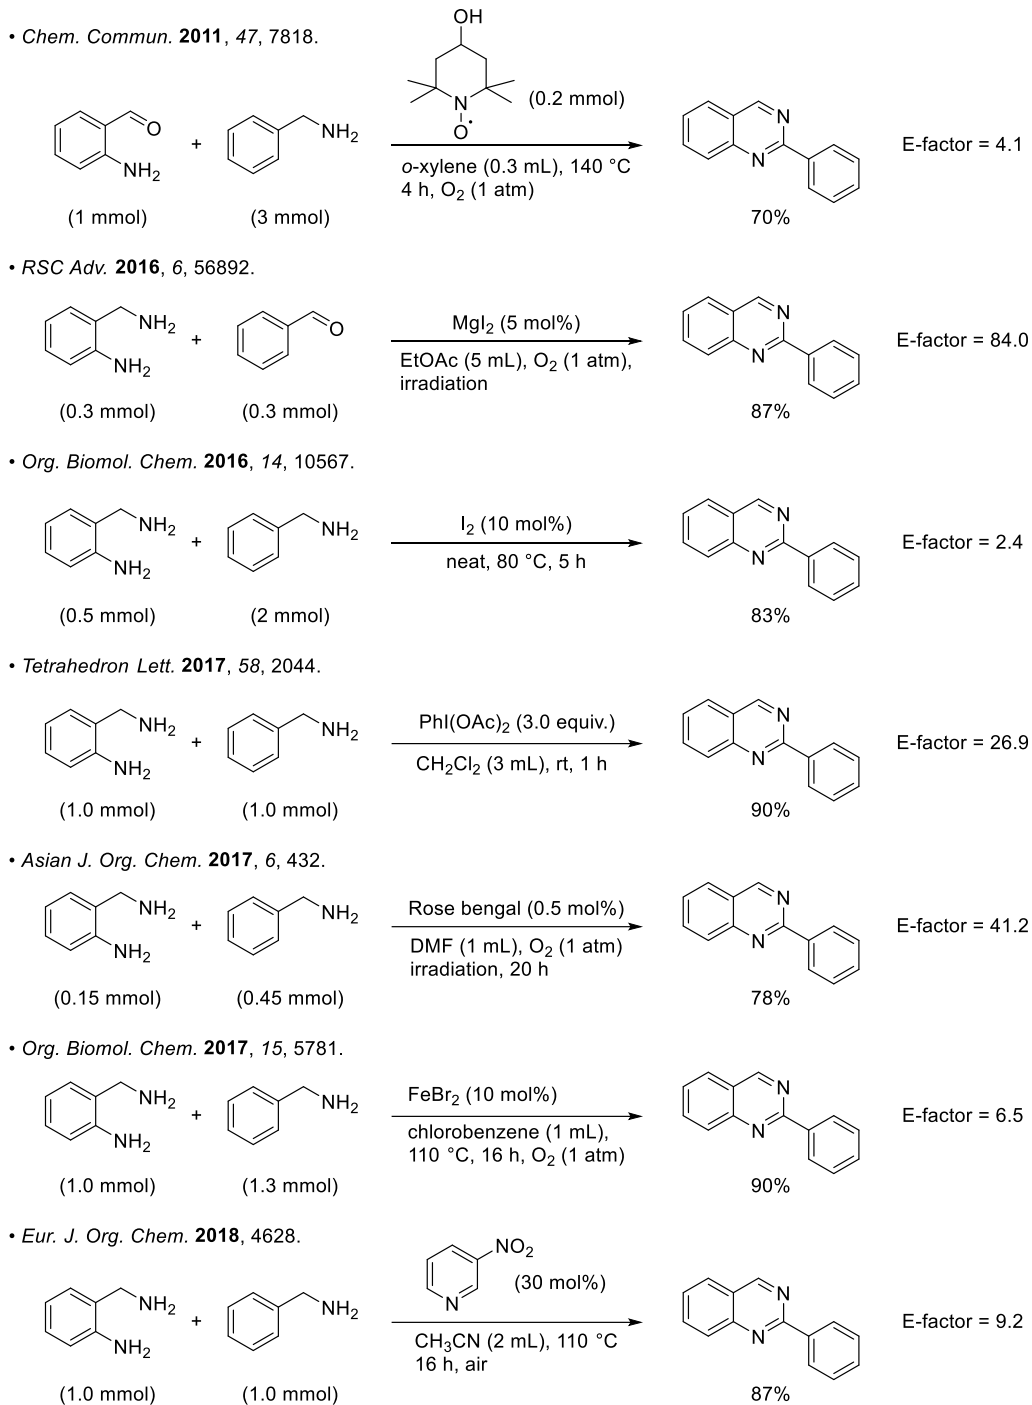

(b) This work

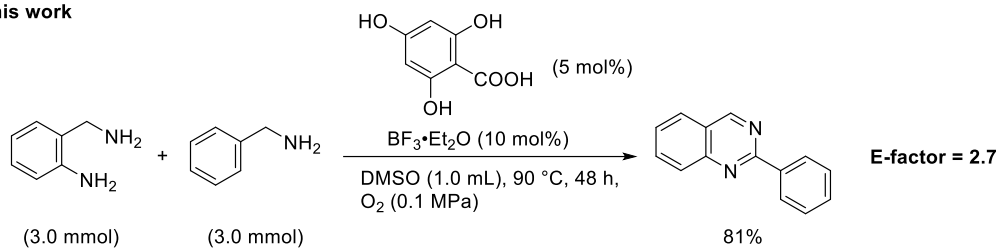

**Figure S1.**  $^1\text{H}$  NMR spectrum of crude **3aa** after the reaction (entry 17 in Table 1, in  $\text{CDCl}_3$ )

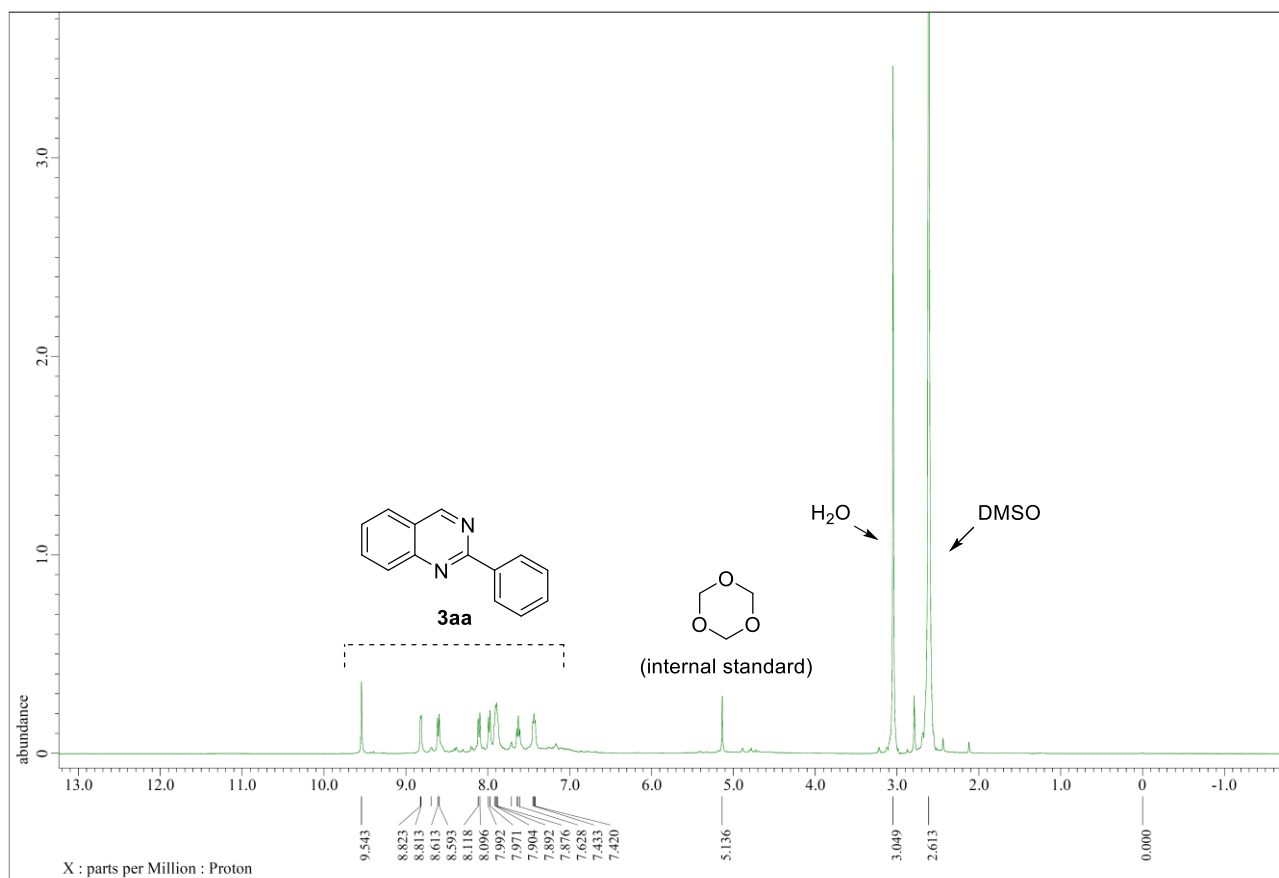

**Table S1.** Optimization of reaction conditions for salicylic acid-catalyzed oxidation of benzylamine to the corresponding imine

c1ccc(cc1)CN (2a, 3.0 mmol) + O=C(O)c1ccccc1O (5 mol%), additive  $\xrightarrow[\text{O}_2 (0.1 \text{ MPa})]{\text{toluene (1.5 mL), 90 }^\circ\text{C, time}}$  c1ccc(cc1)/C=N/c2ccccc2 (4a)

| Entry | Additive (mg) | Time (h) | Yield <b>4a</b> (%) <sup>a</sup> |
|-------|---------------|----------|----------------------------------|
| 1     | -             | 2        | 14                               |
| 2     | -             | 4        | 26                               |
| 3     | -             | 16       | 79                               |
| 4     | -             | 24       | 73                               |
| 5     | 4A MS (100)   | 16       | 98 (87)                          |

<sup>a</sup>Yields were determined by  $^1\text{H}$  NMR spectroscopy (isolated yield)

**Figure S2:** Copies of  $^1\text{H}$  and  $^{13}\text{C}\{^1\text{H}\}$  NMR spectra of compound **3aa**

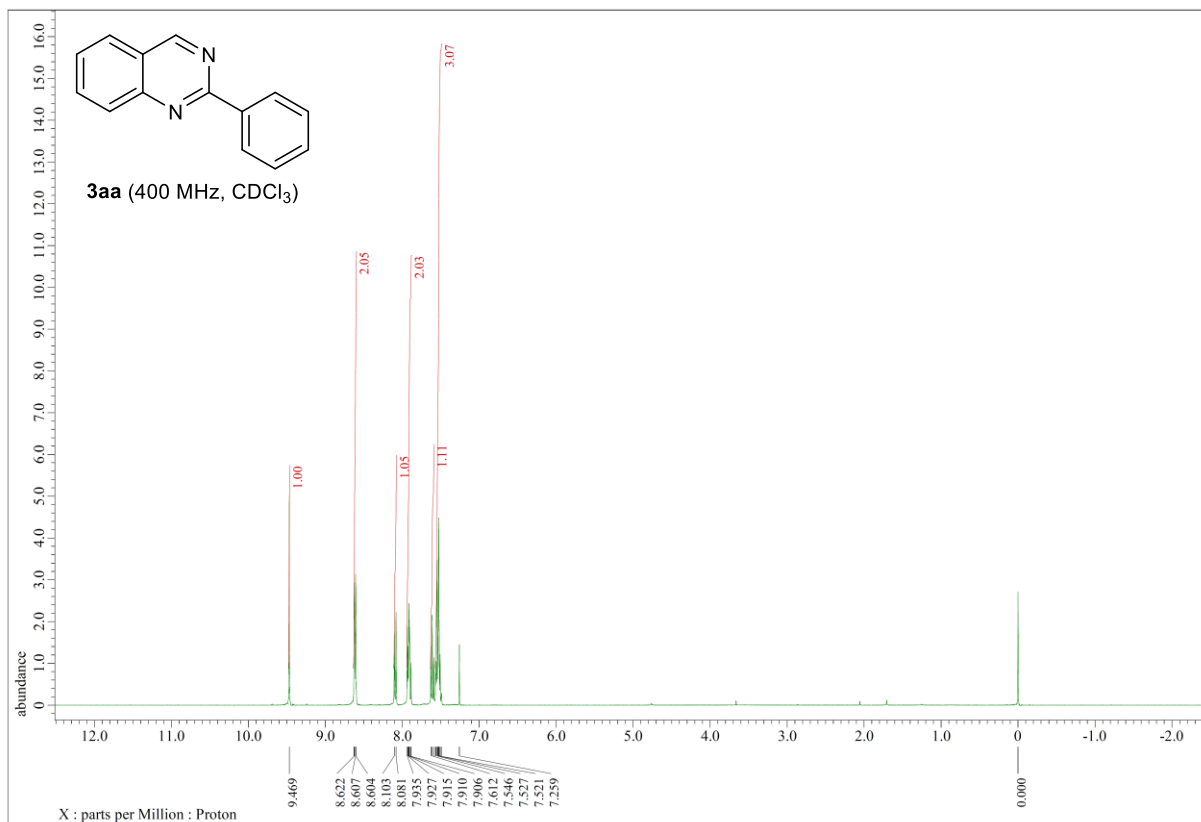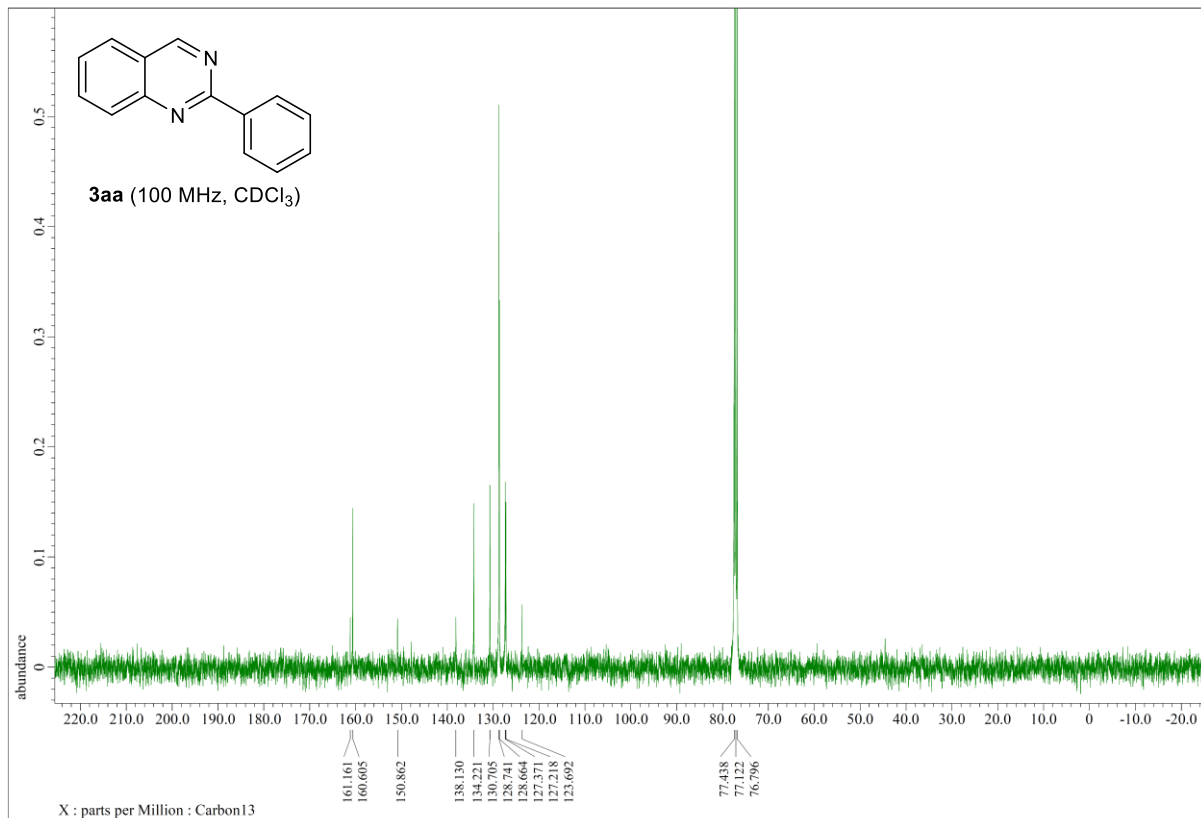

**Figure S3:** Copies of  $^1\text{H}$  and  $^{13}\text{C}\{^1\text{H}\}$  NMR spectra of compound **3ab**

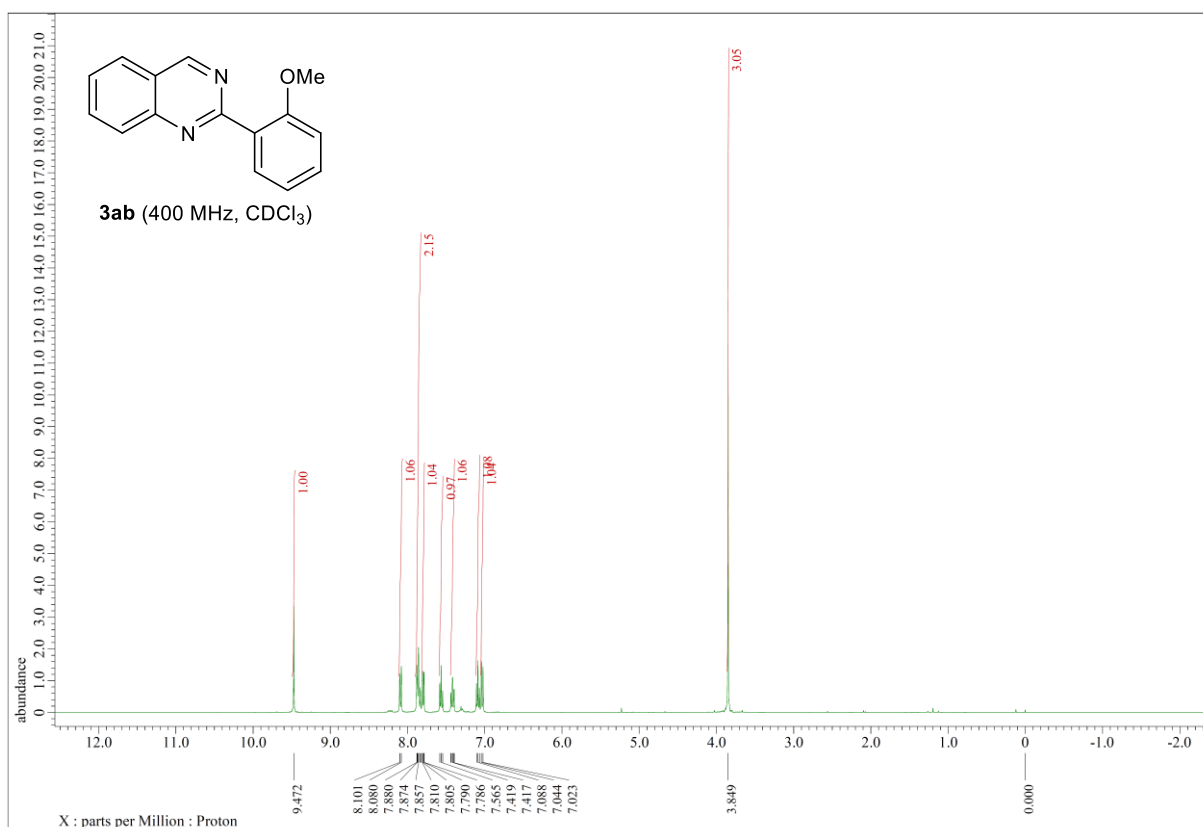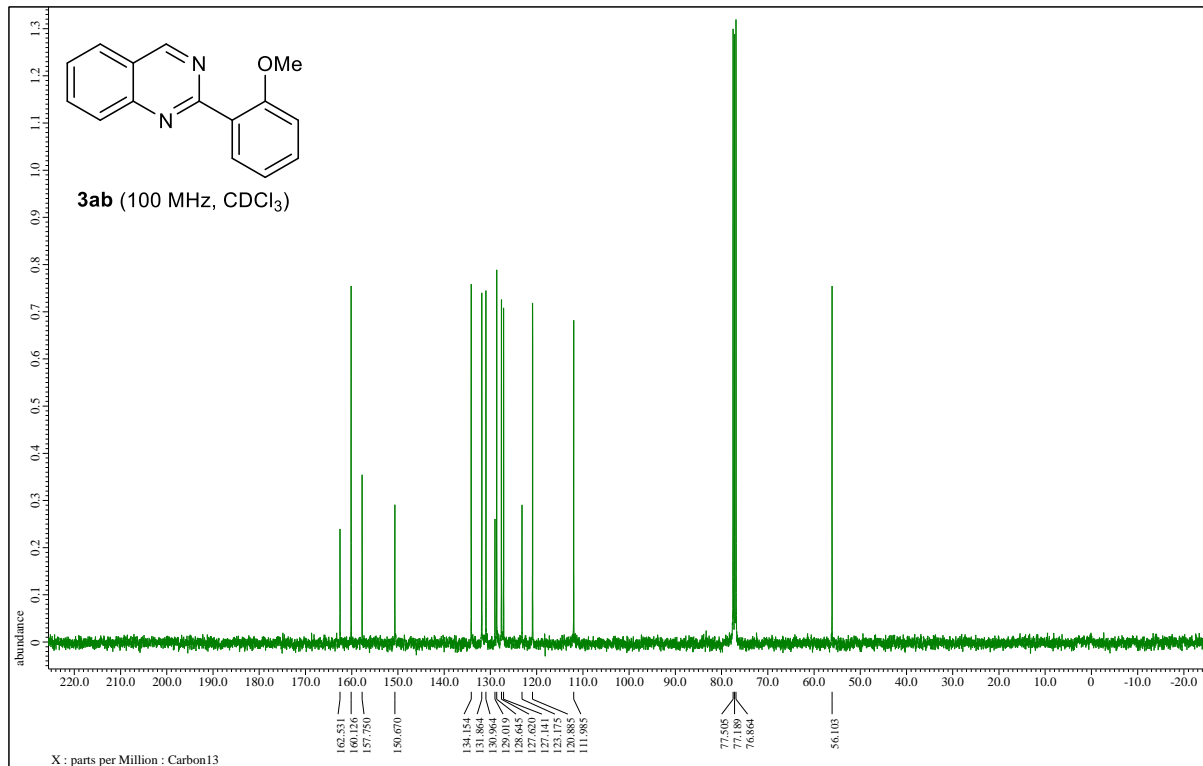

**Figure S4:** Copies of  $^1\text{H}$  and  $^{13}\text{C}\{^1\text{H}\}$  NMR spectra of compound **3ac**

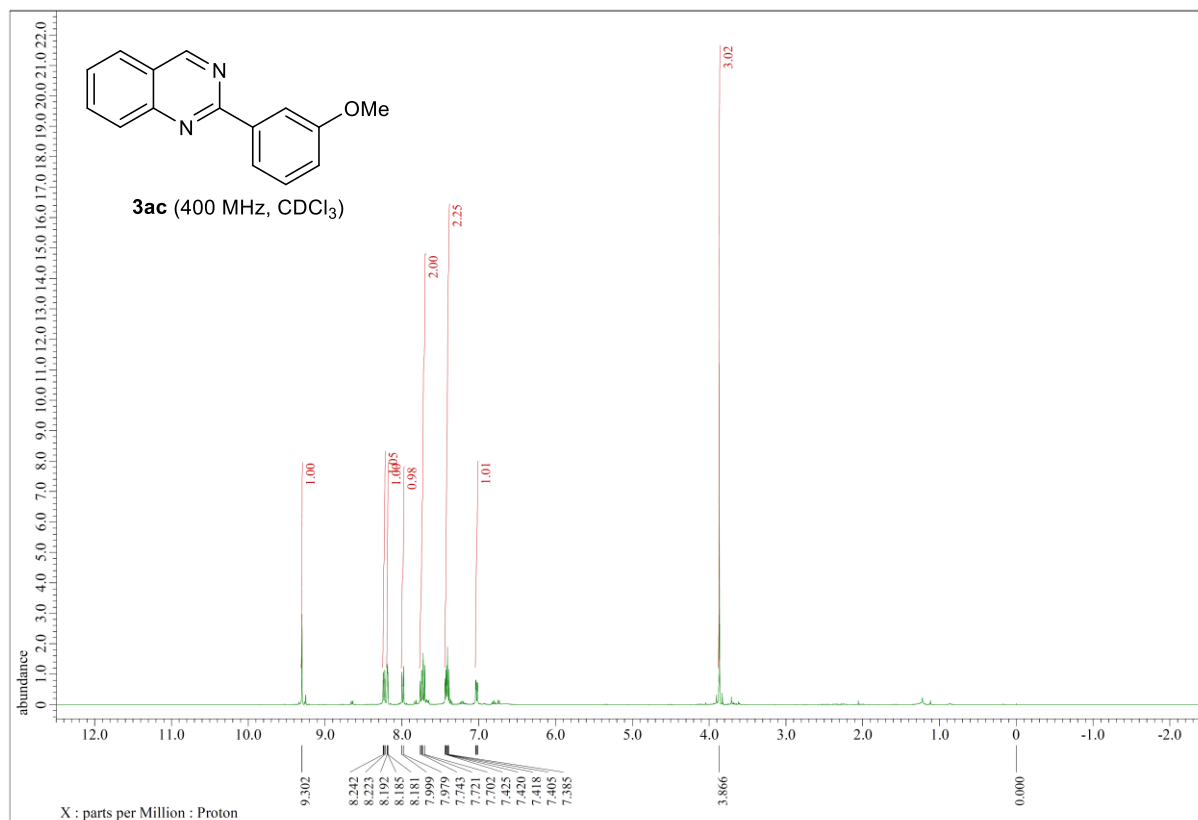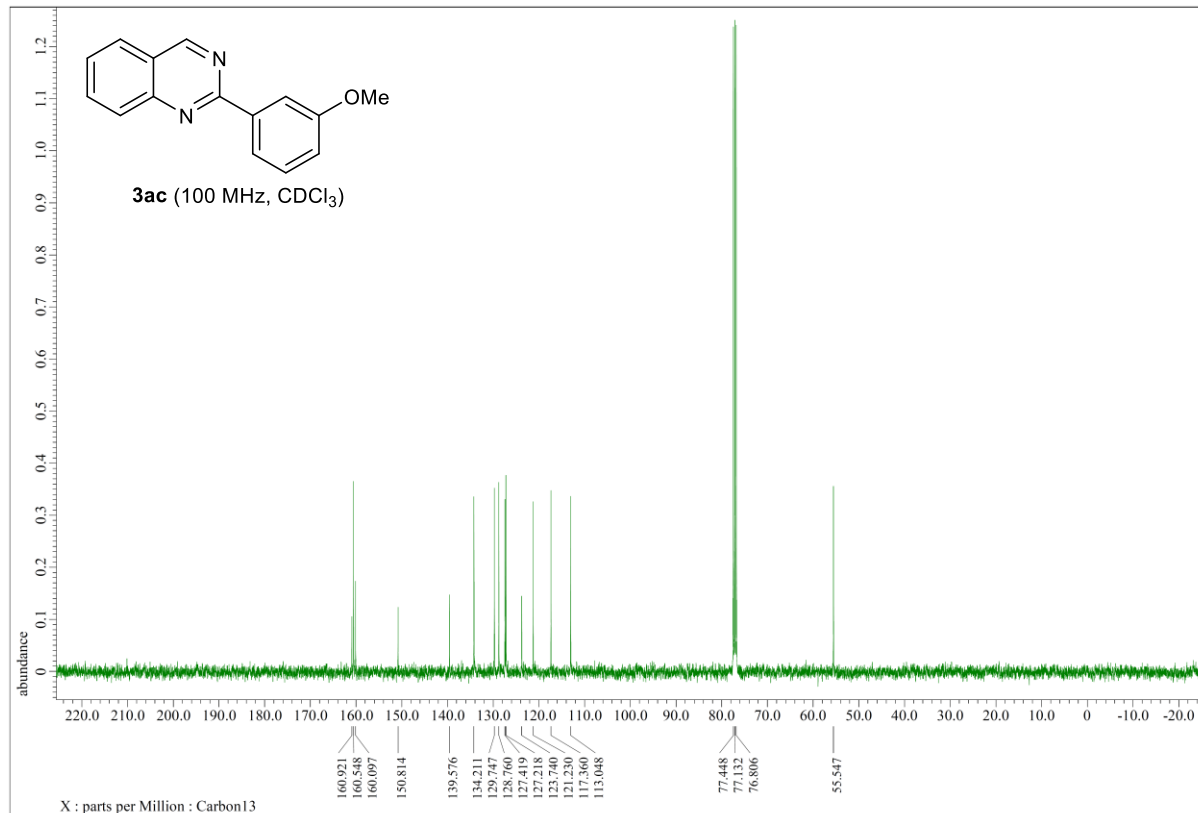

**Figure S5:** Copies of  $^1\text{H}$  and  $^{13}\text{C}\{^1\text{H}\}$  NMR spectra of compound **3ad**

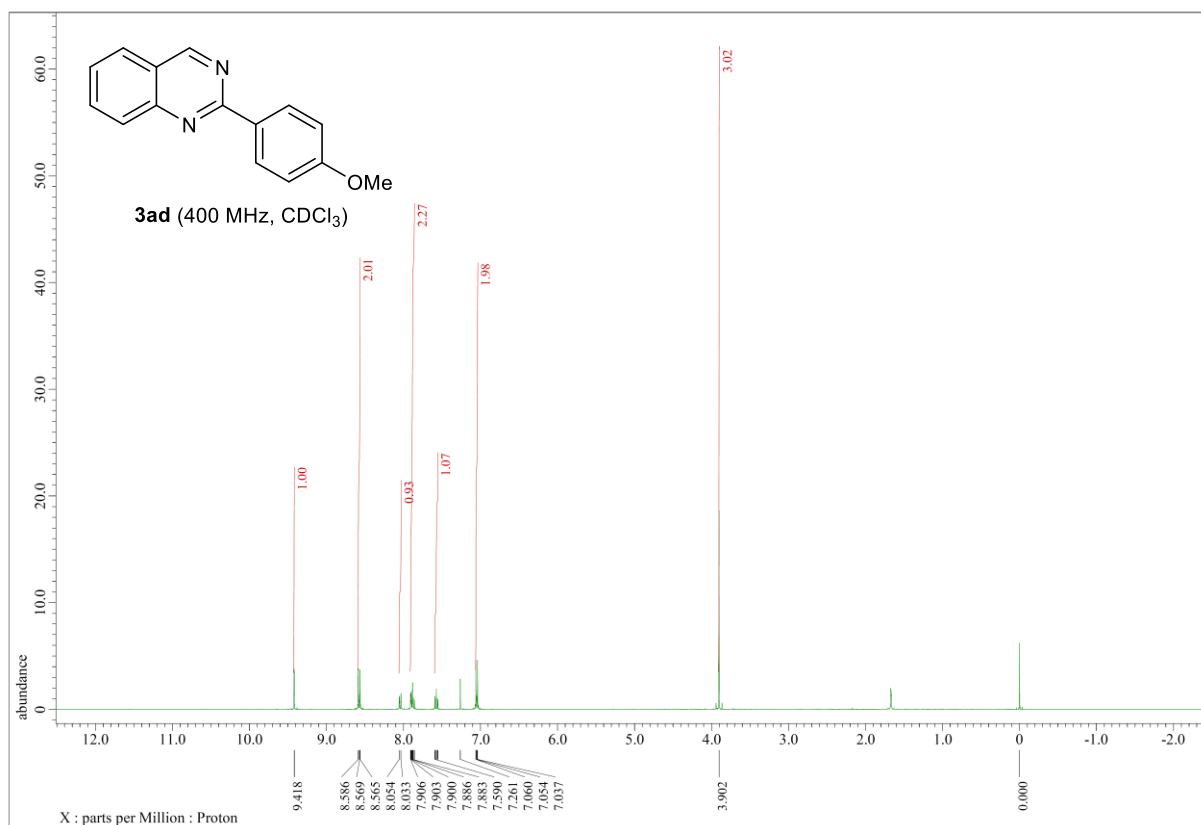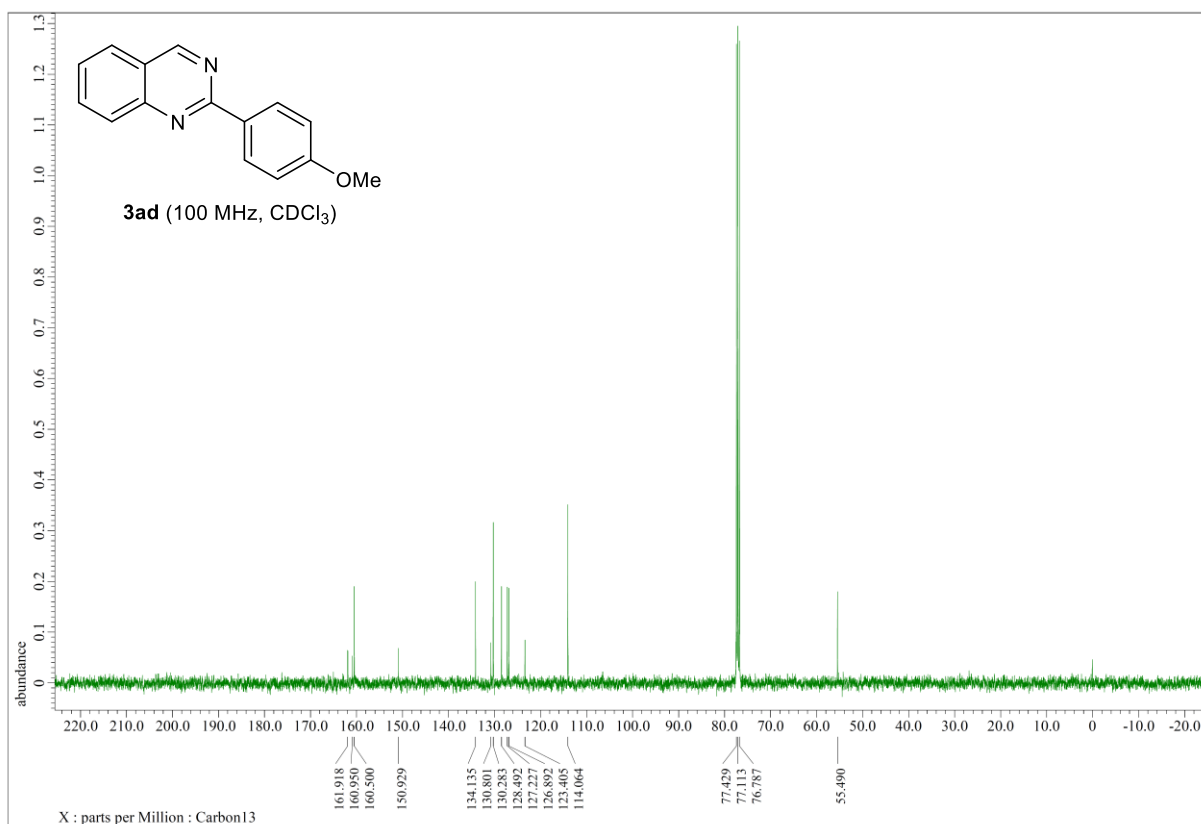

**Figure S6:** Copies of  $^1\text{H}$  and  $^{13}\text{C}\{^1\text{H}\}$  NMR spectra of compound **3ae**

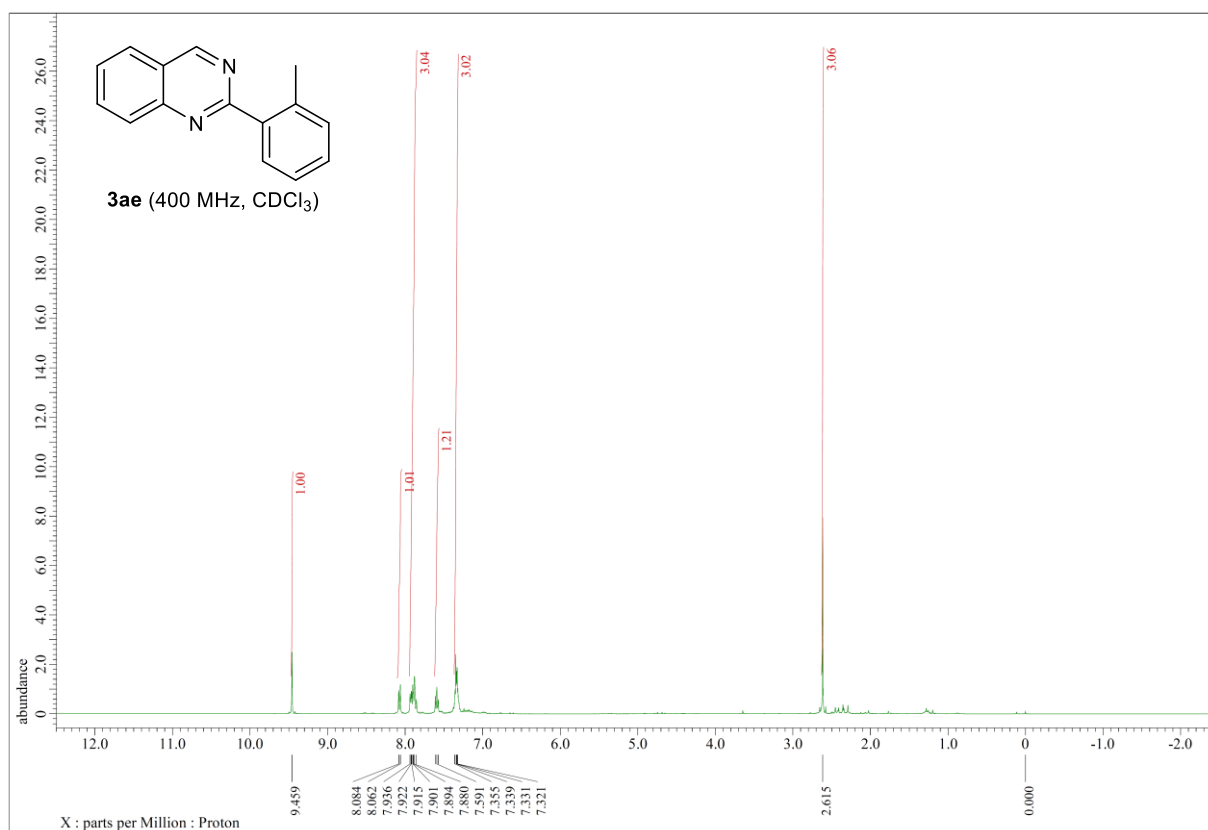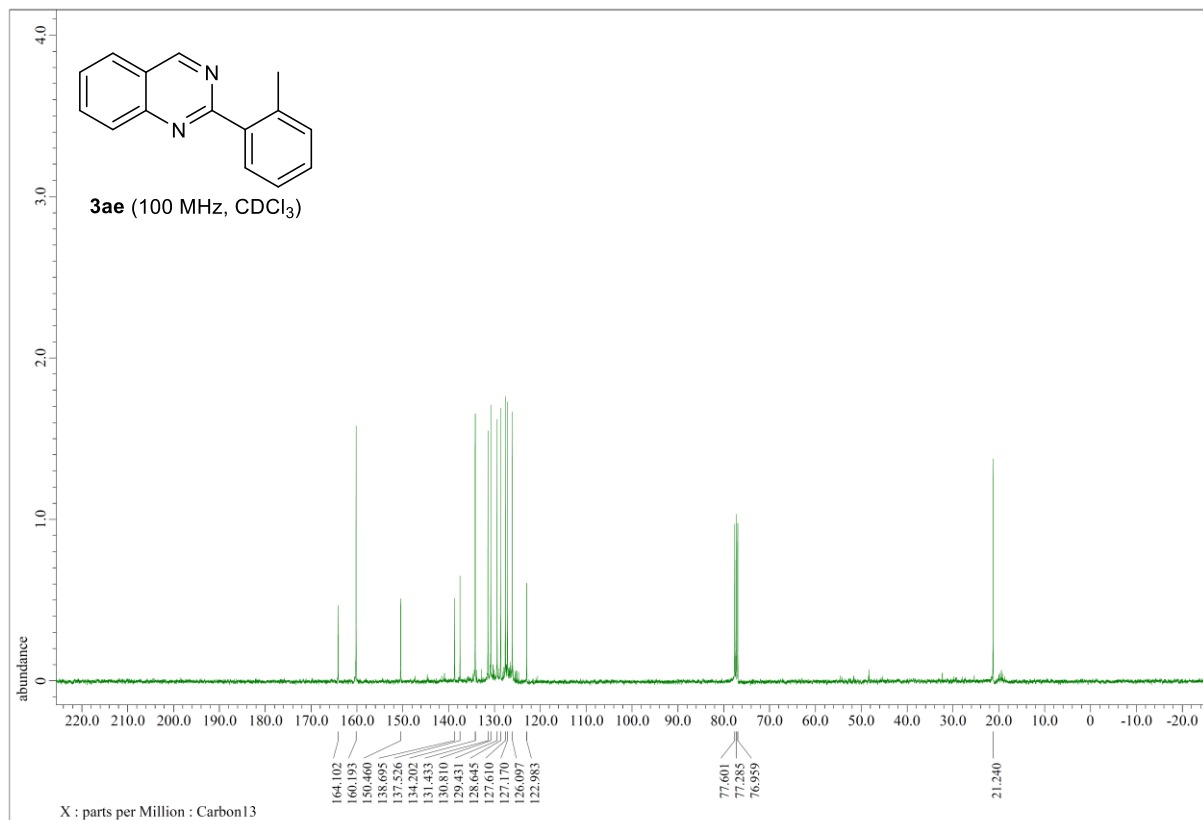



**Figure S7:** Copies of  $^1\text{H}$  and  $^{13}\text{C}\{^1\text{H}\}$  NMR spectra of compound **3af**

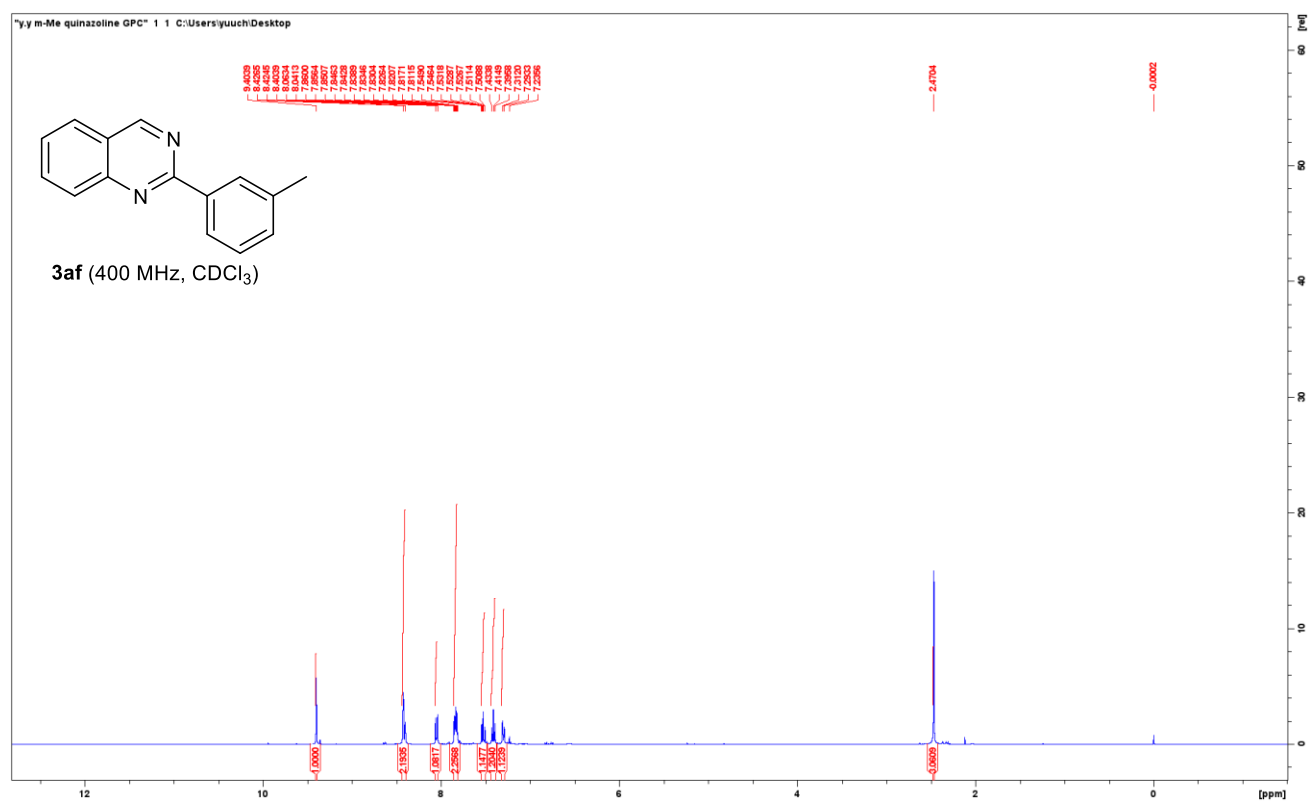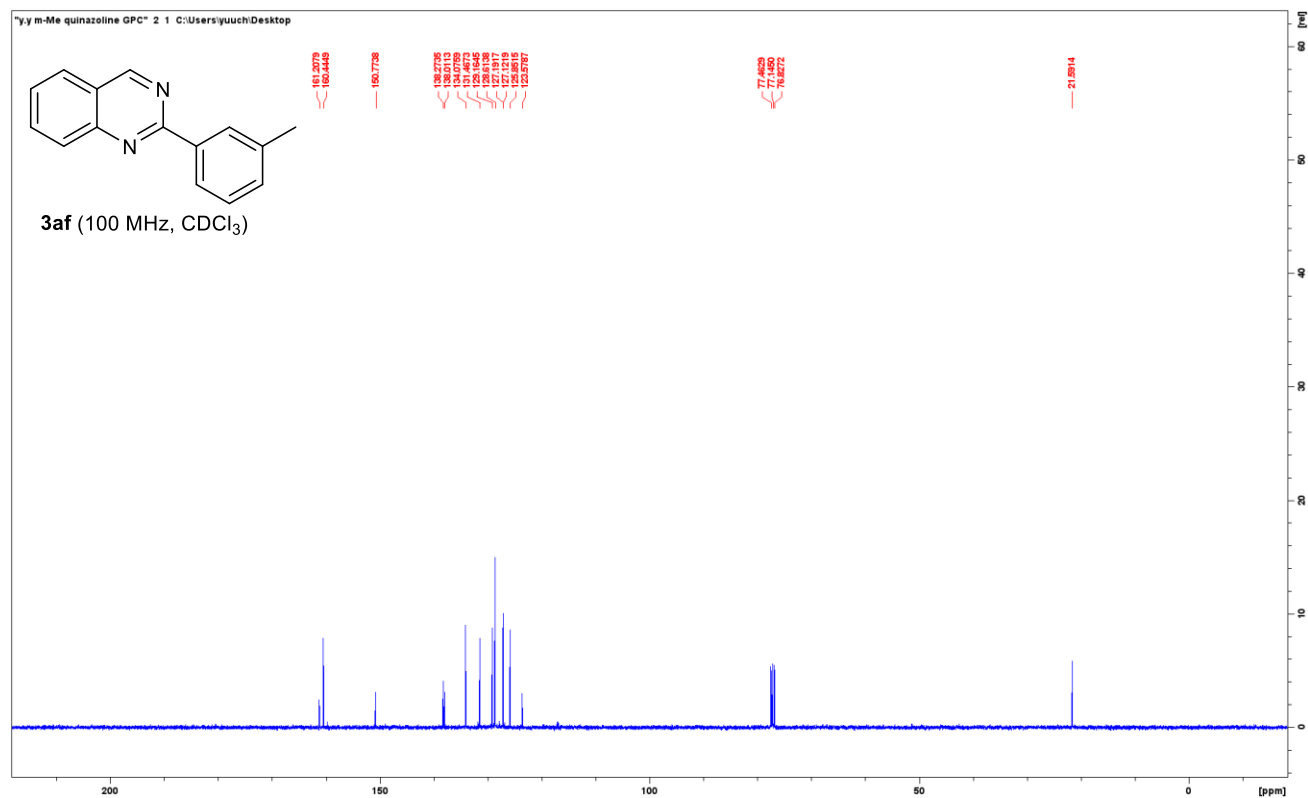

**Figure S8:** Copies of  $^1\text{H}$  and  $^{13}\text{C}\{^1\text{H}\}$  NMR spectra of compound **3ag**

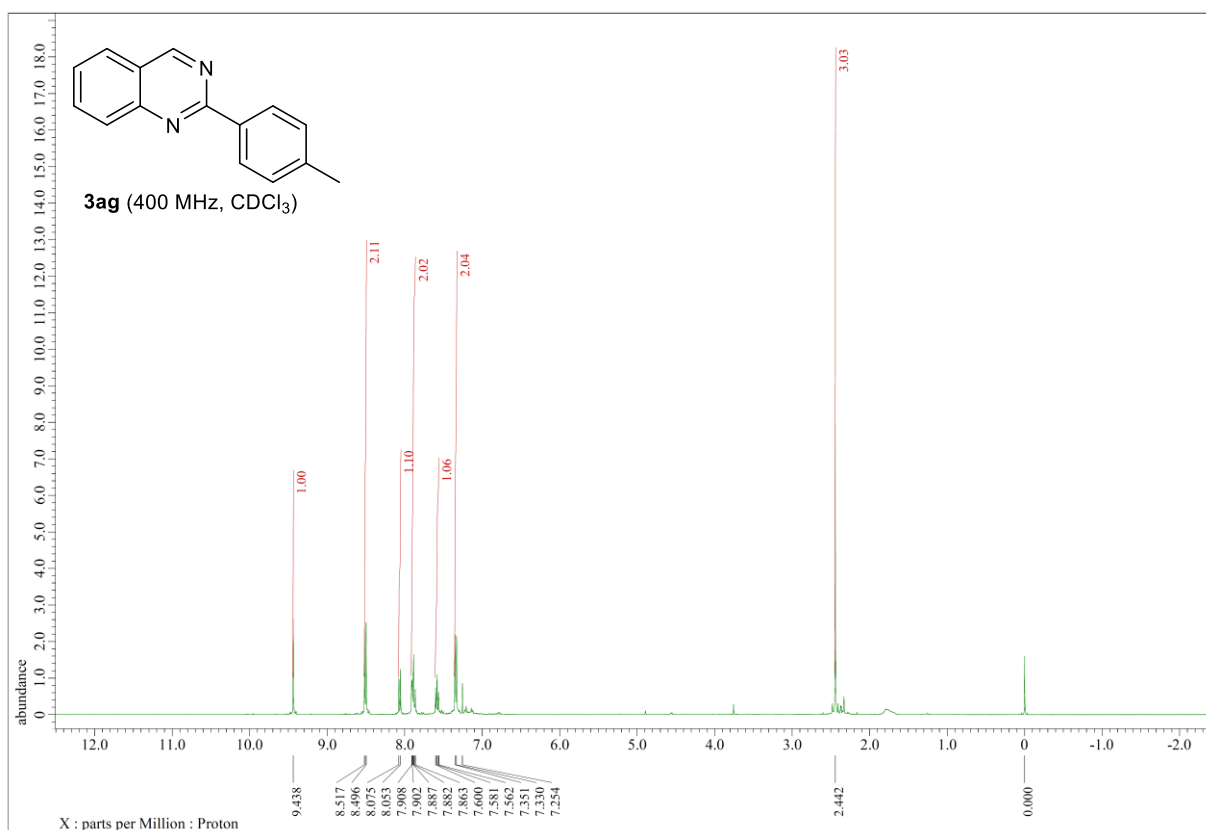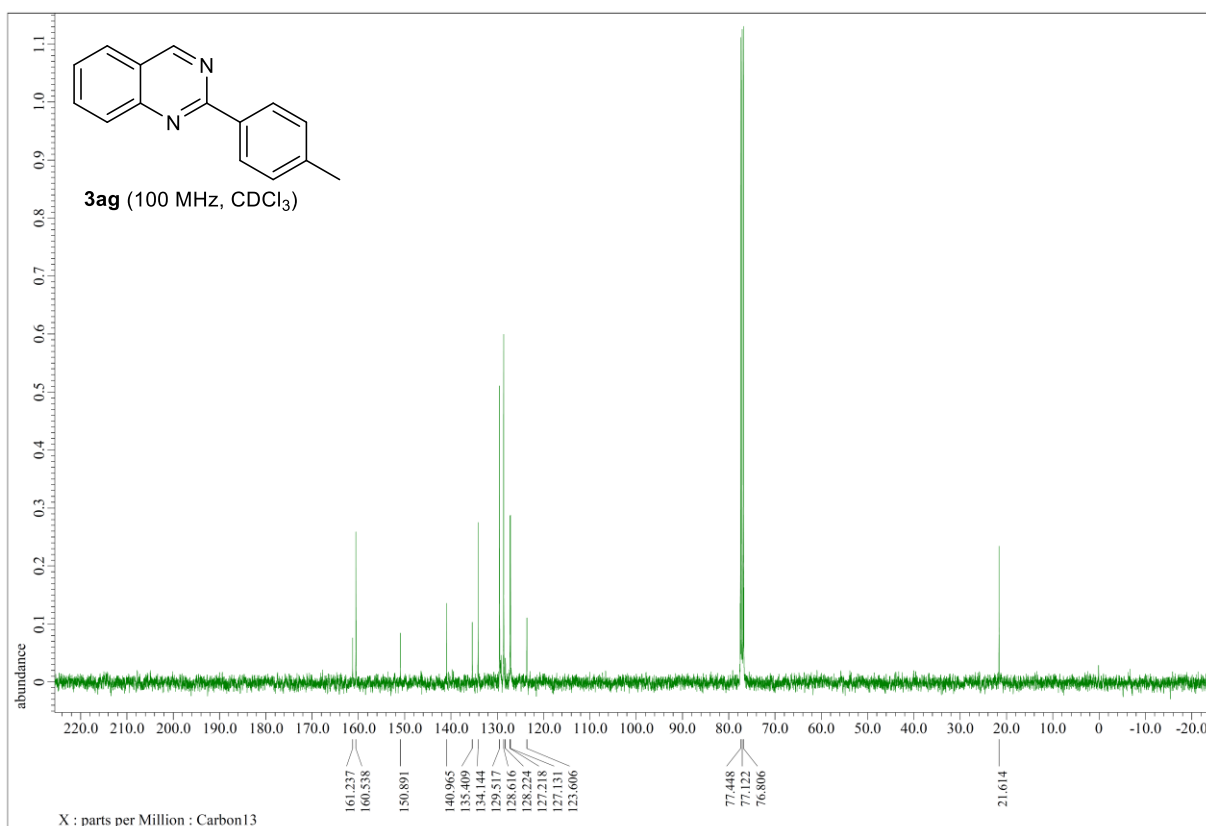

**Figure S9:** Copies of  $^1\text{H}$  and  $^{13}\text{C}\{^1\text{H}\}$  NMR spectra of compound **3ah**

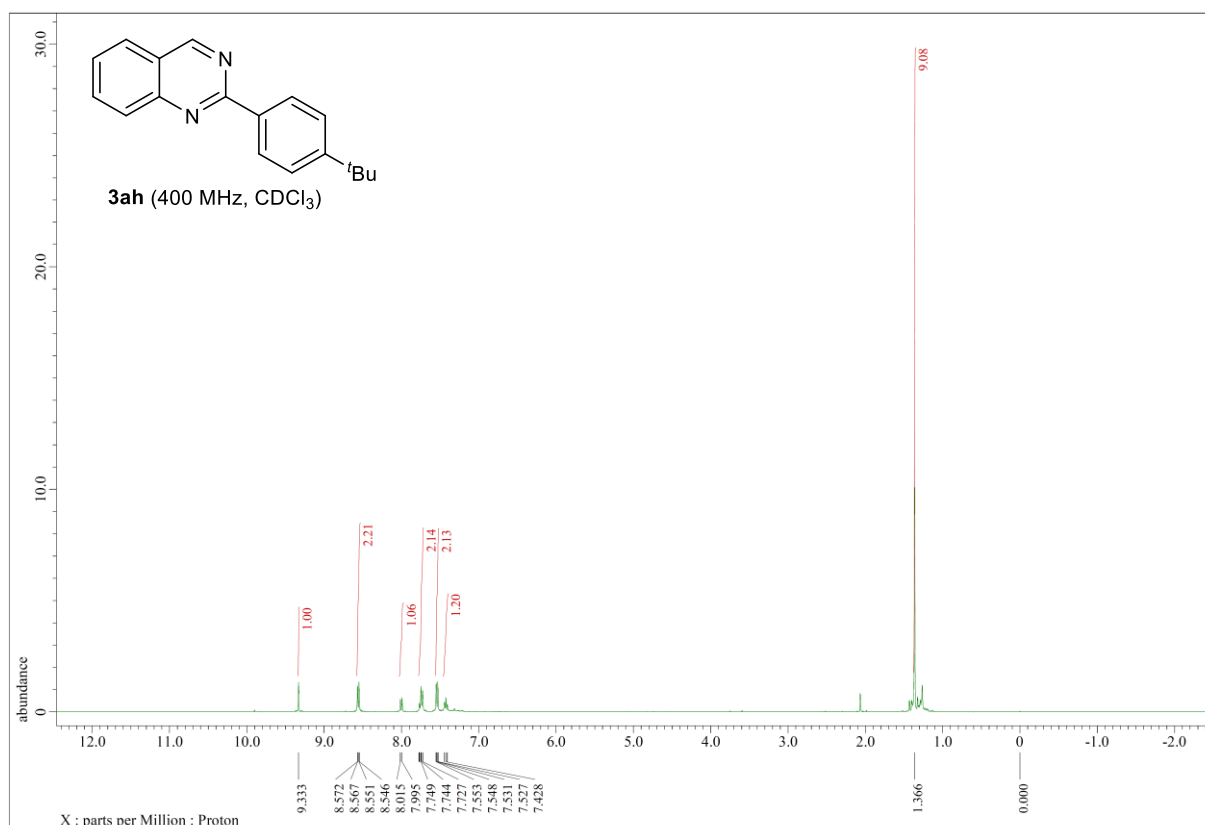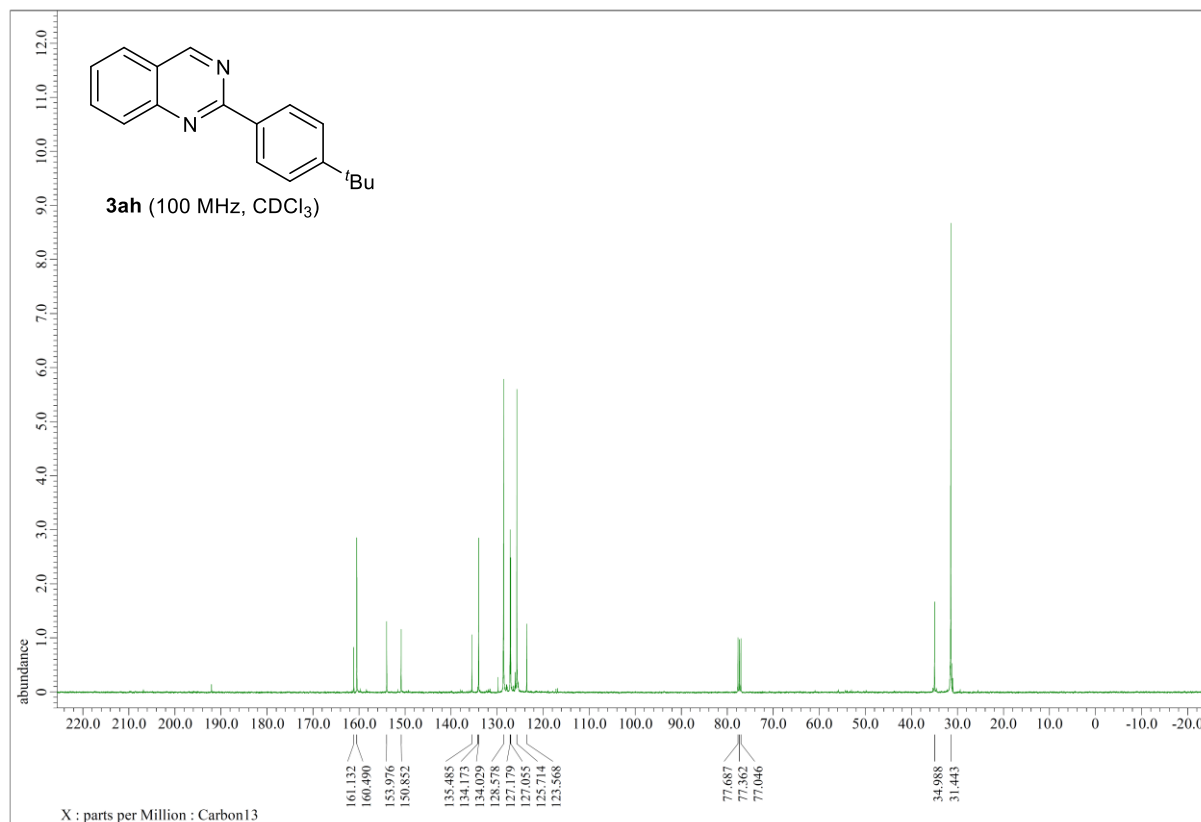

**Figure S10:** Copies of  $^1\text{H}$  and  $^{13}\text{C}\{^1\text{H}\}$  NMR spectra of compound **3aj**

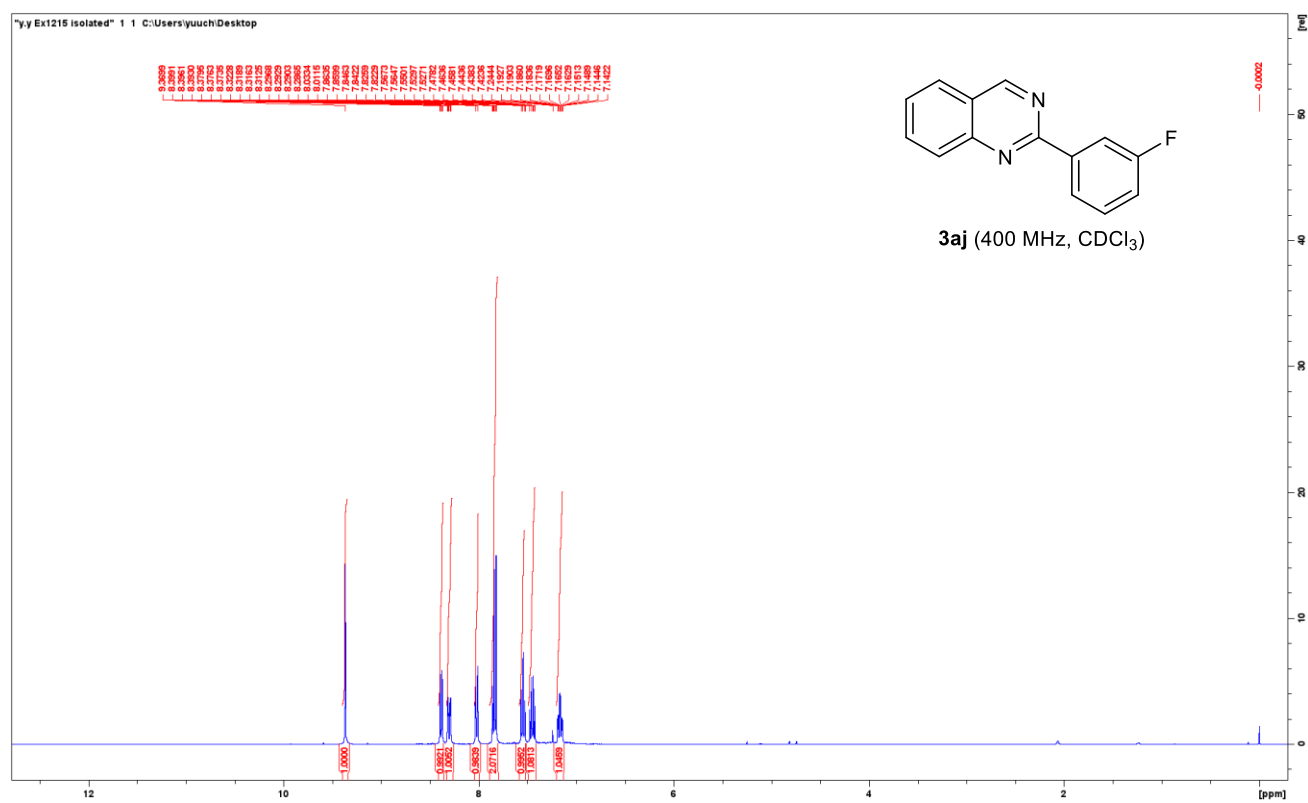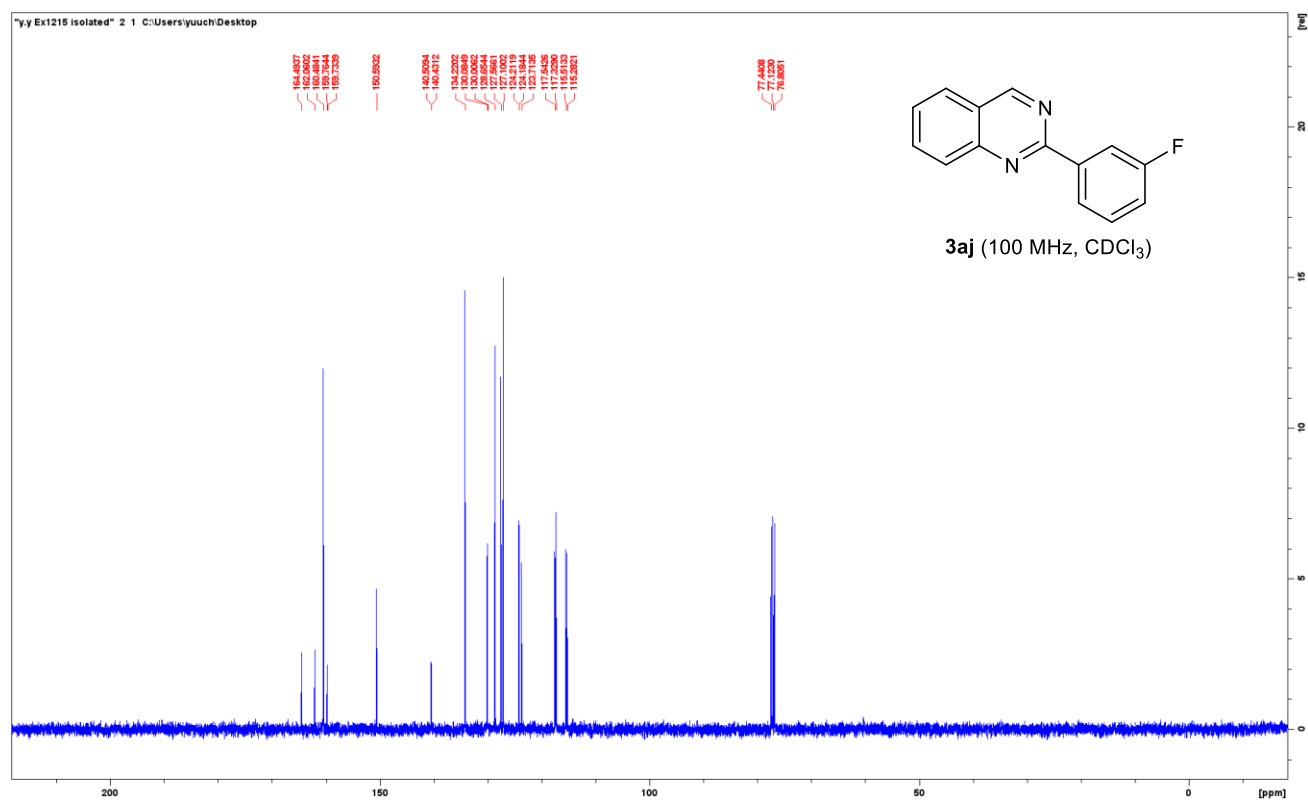

**Figure S11:** Copies of  $^1\text{H}$  and  $^{13}\text{C}\{^1\text{H}\}$  NMR spectra of compound **3ak**

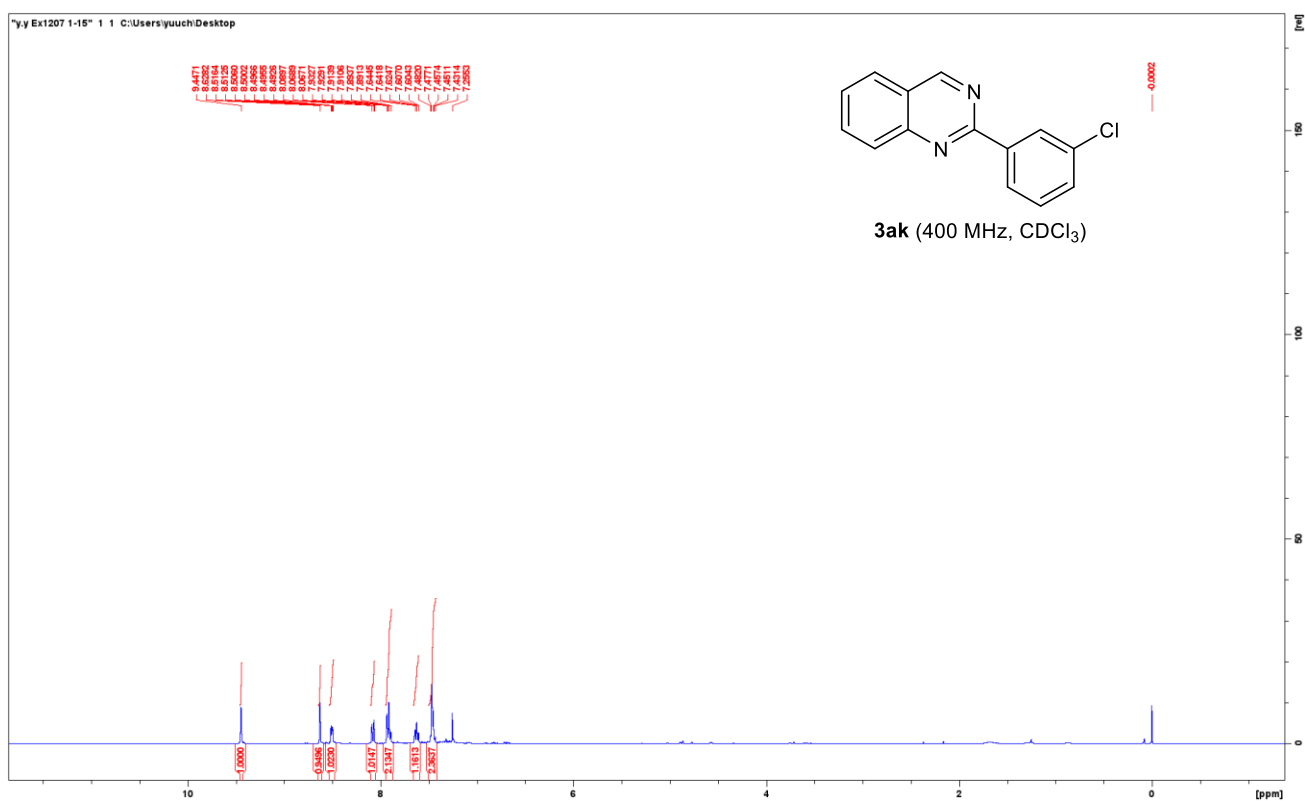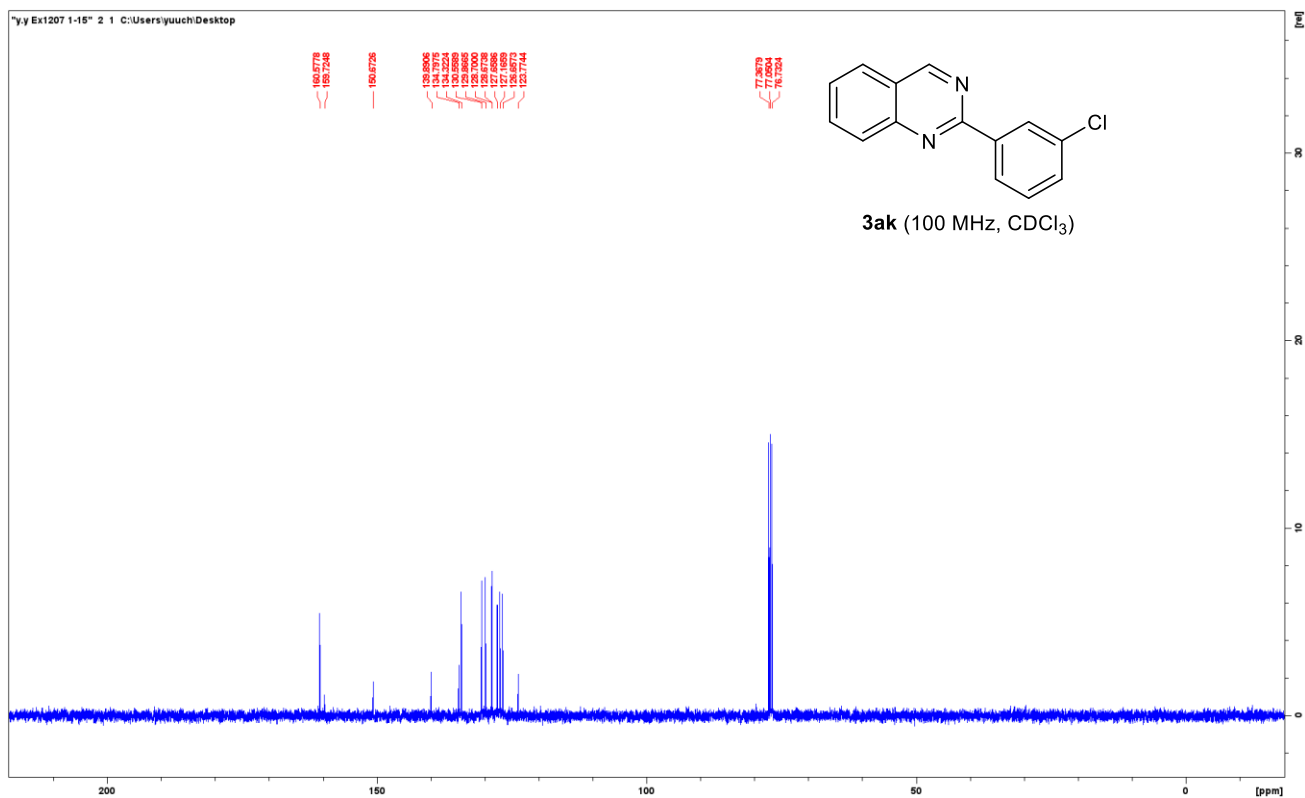

Figure S12: Copies of  $^1\text{H}$  and  $^{13}\text{C}\{^1\text{H}\}$  NMR spectra of compound **3aI**

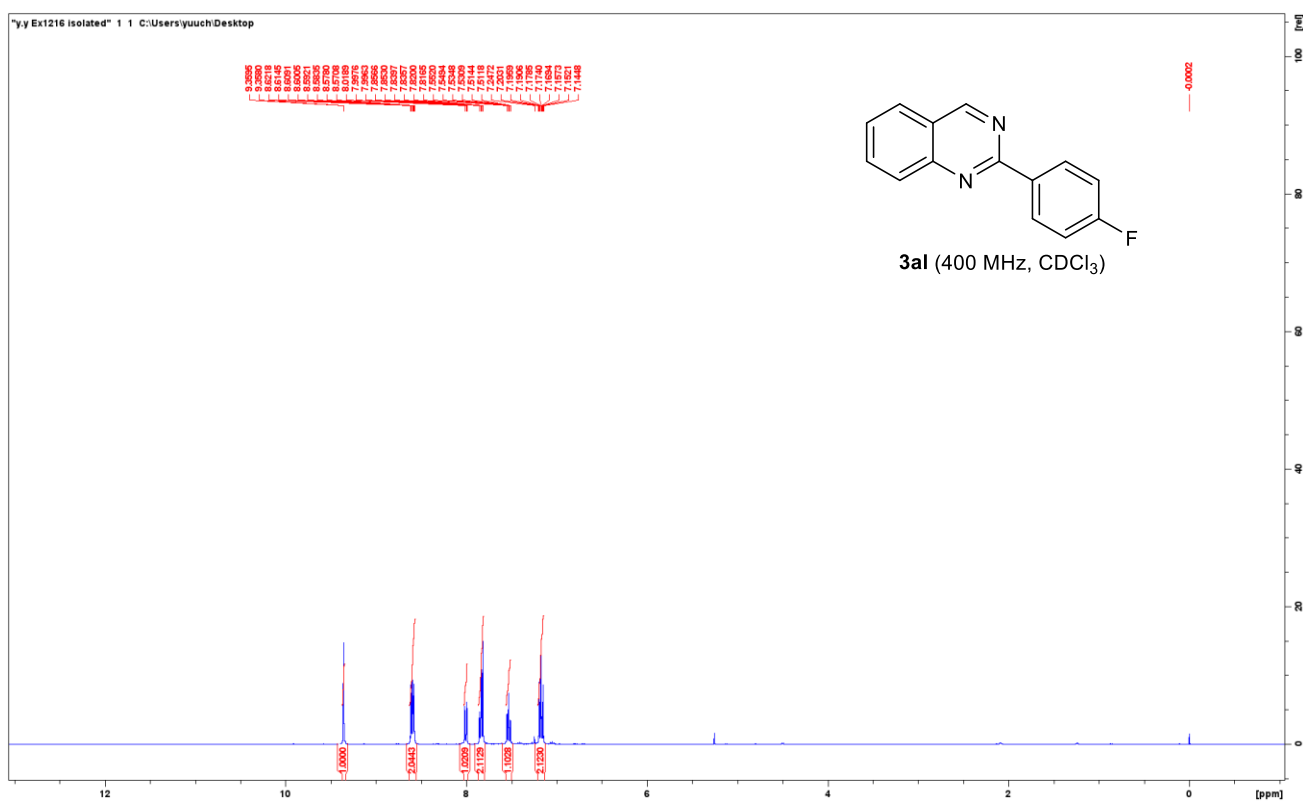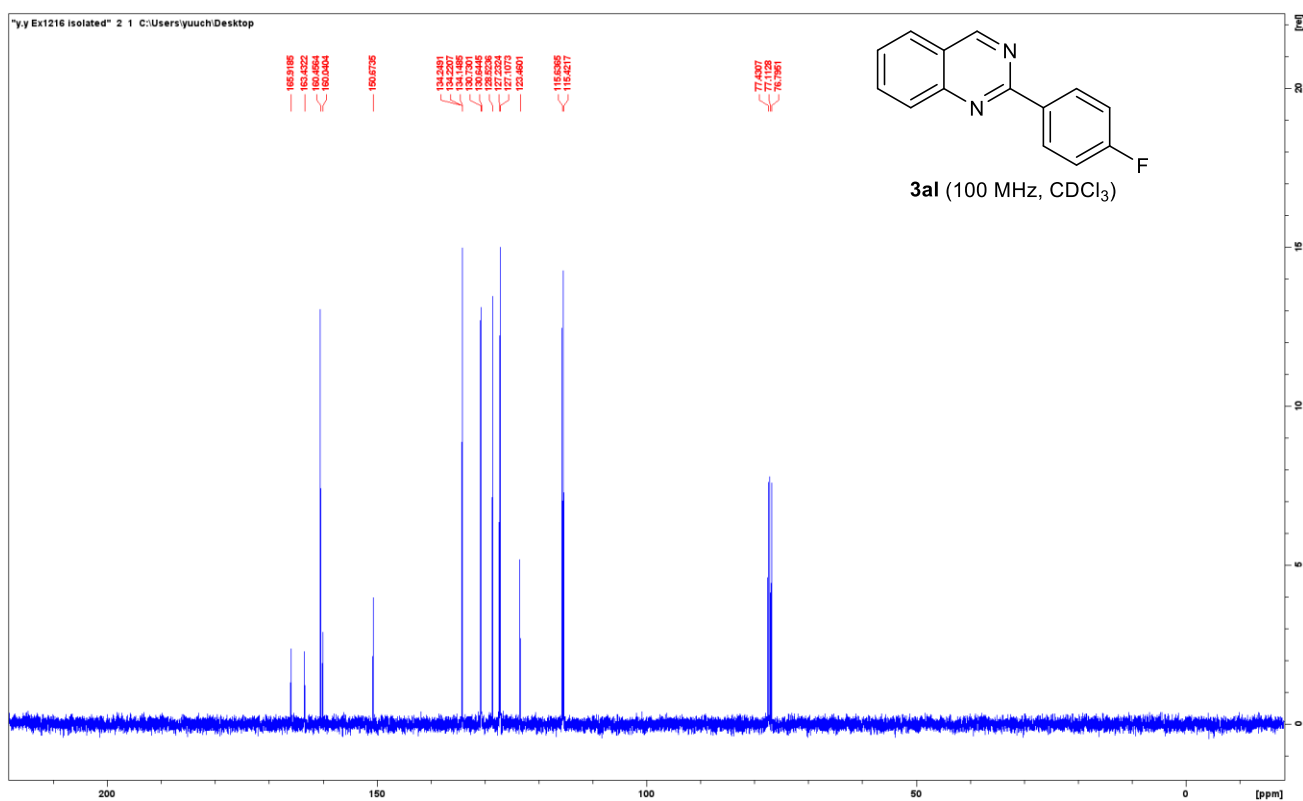

**Figure S13:** Copies of  $^1\text{H}$  and  $^{13}\text{C}\{^1\text{H}\}$  NMR spectra of compound **3am**

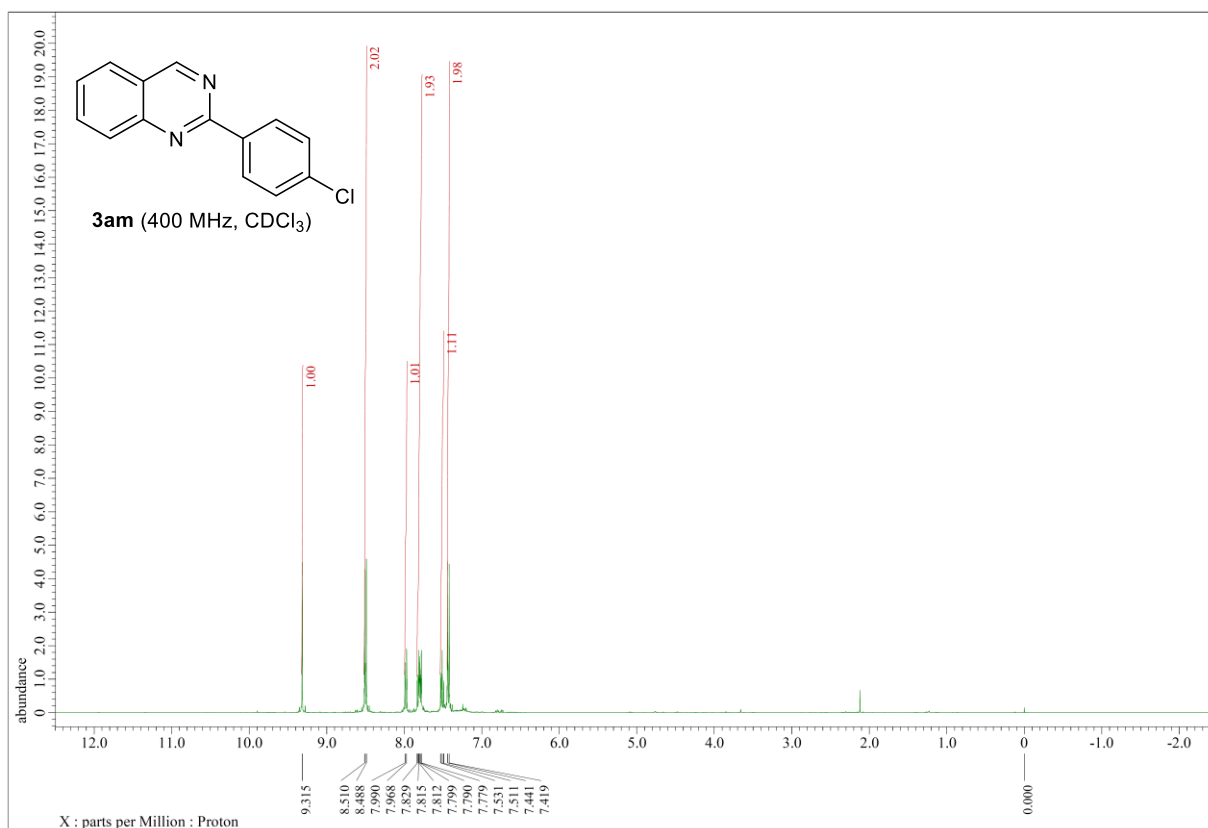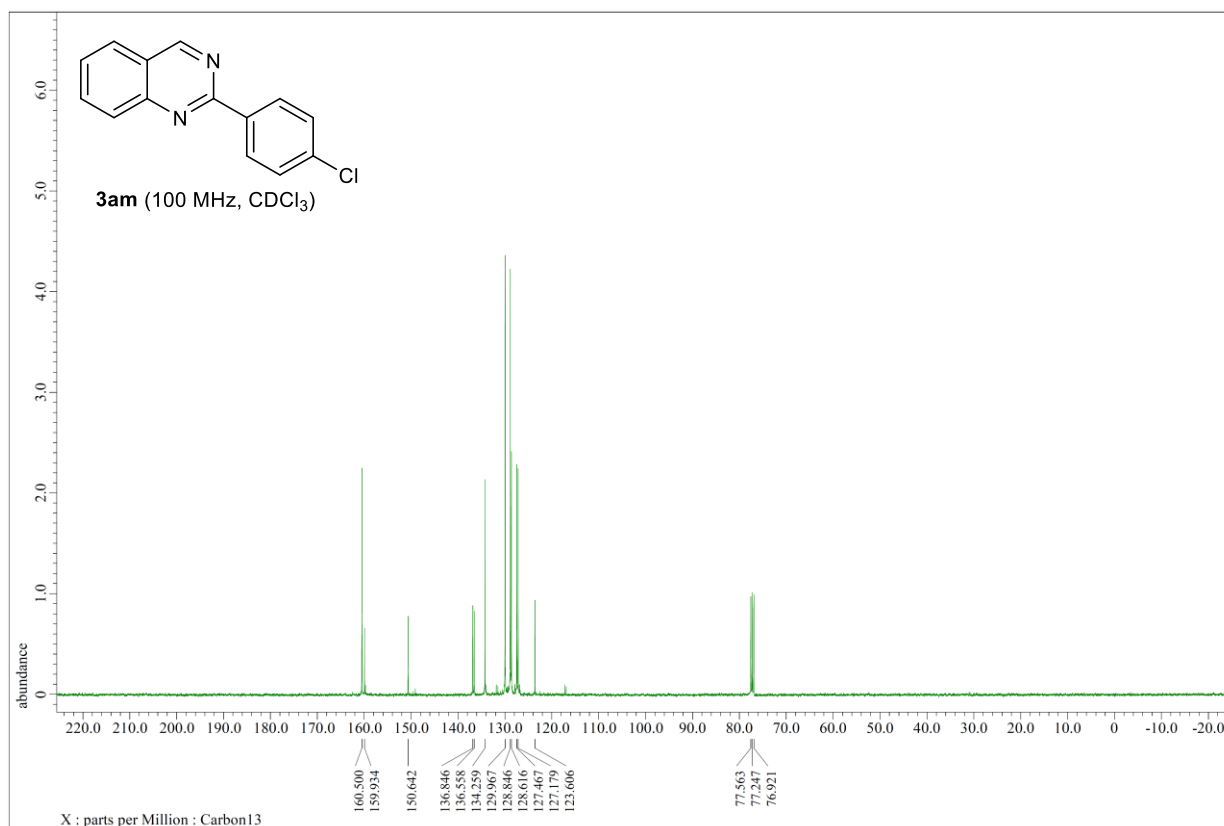

Figure S14: Copies of  $^1\text{H}$  and  $^{13}\text{C}\{^1\text{H}\}$  NMR spectra of compound **3an**

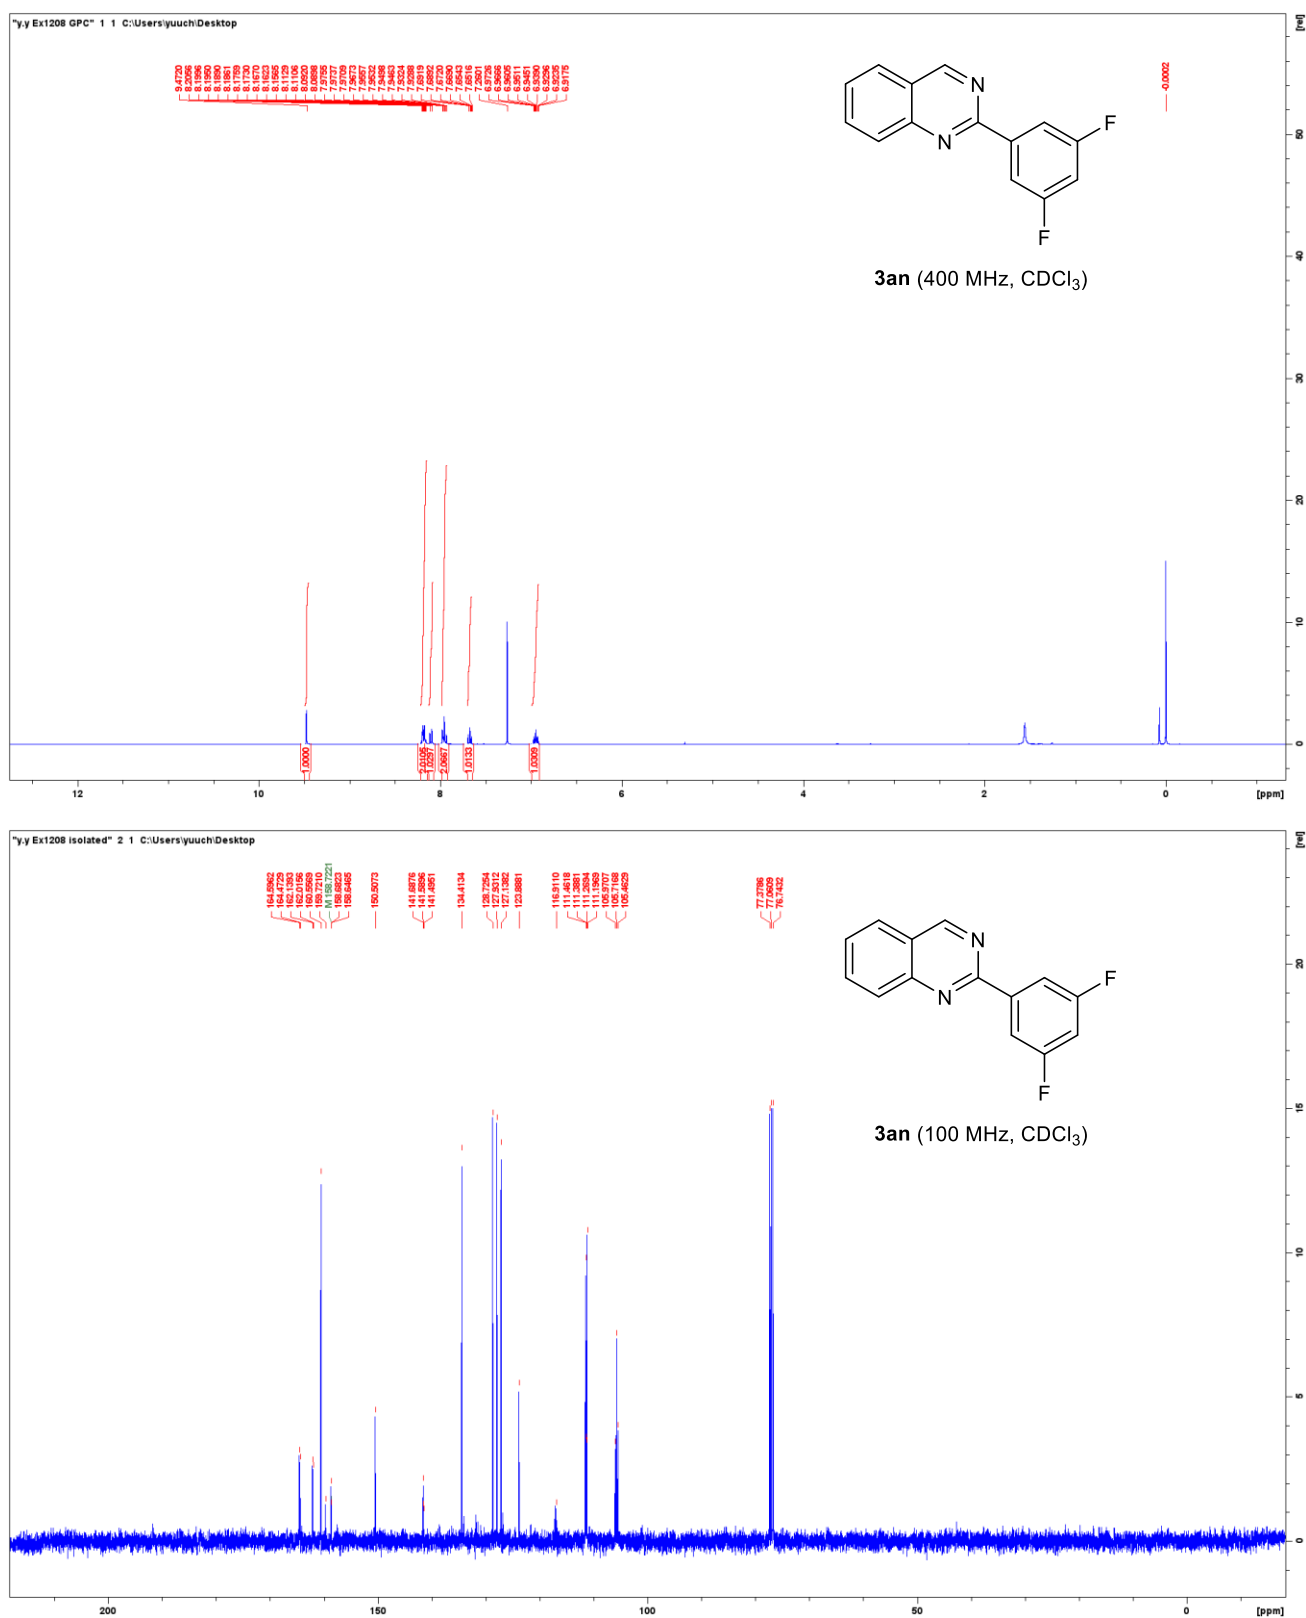



**Figure S15:** Copies of  $^1\text{H}$  and  $^{13}\text{C}\{^1\text{H}\}$  NMR spectra of compound **3ao**

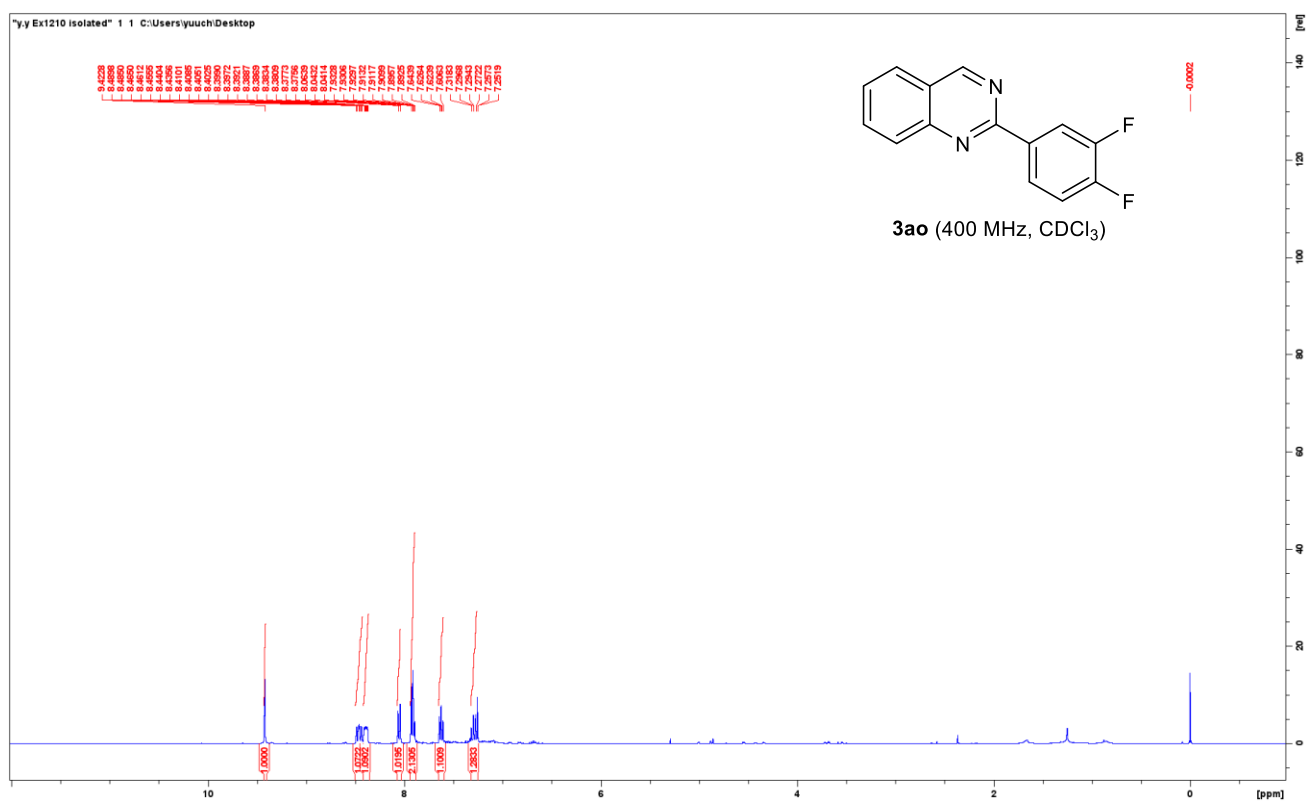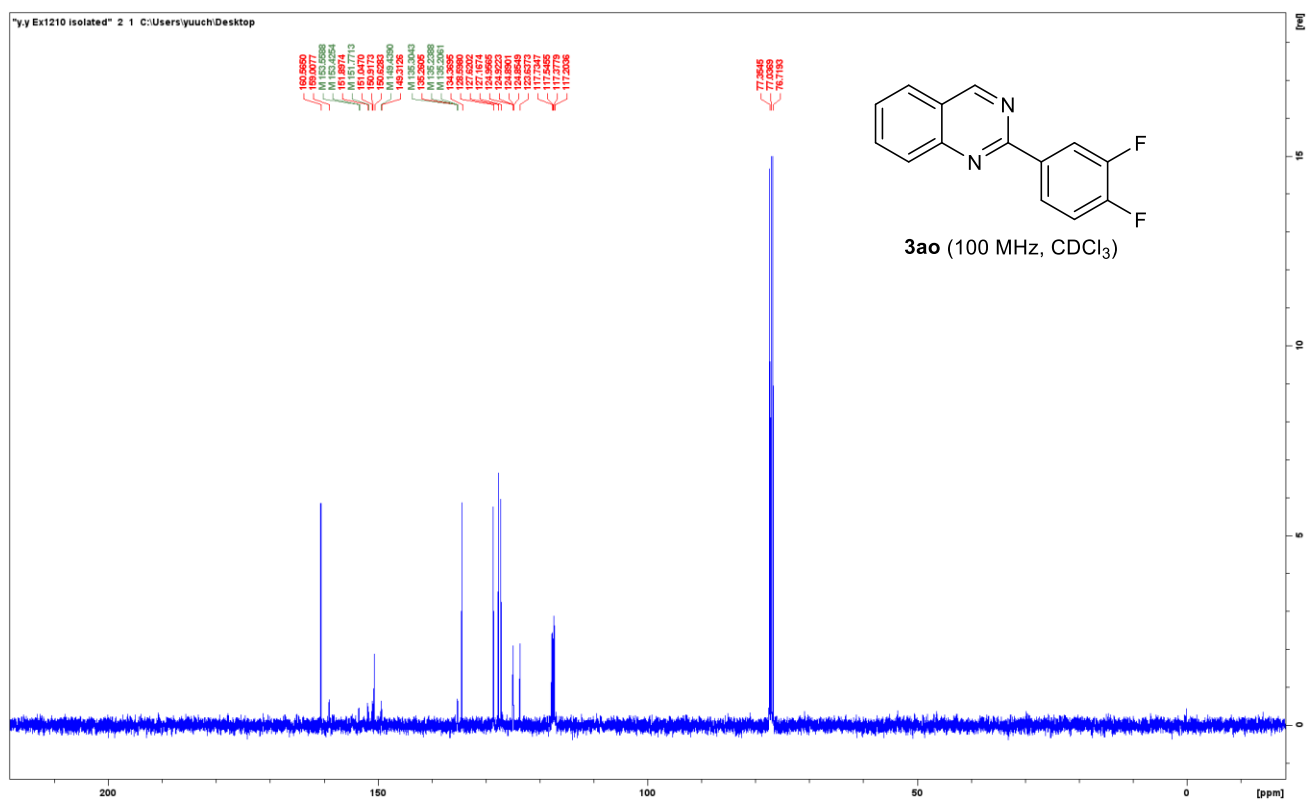

Figure S16: Copies of  $^1\text{H}$  and  $^{13}\text{C}\{^1\text{H}\}$  NMR spectra of compound **3ap**

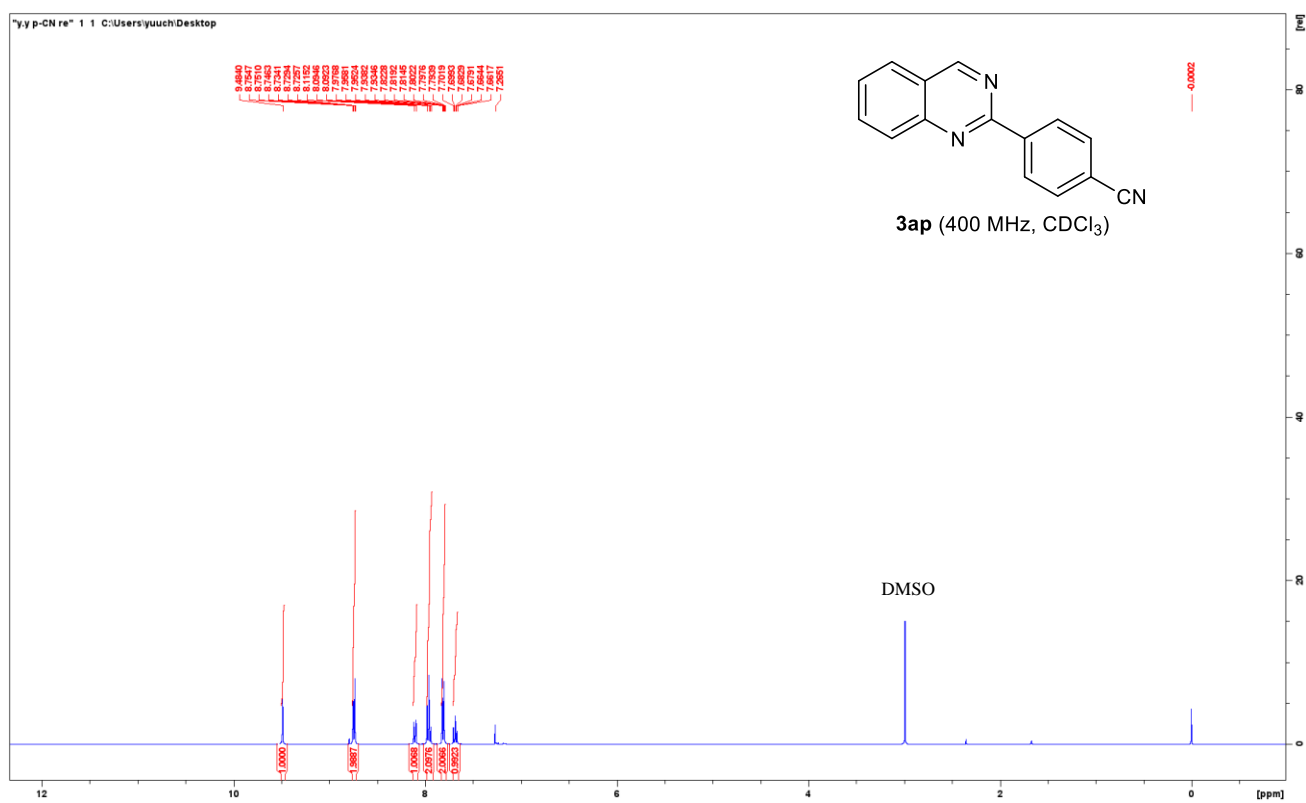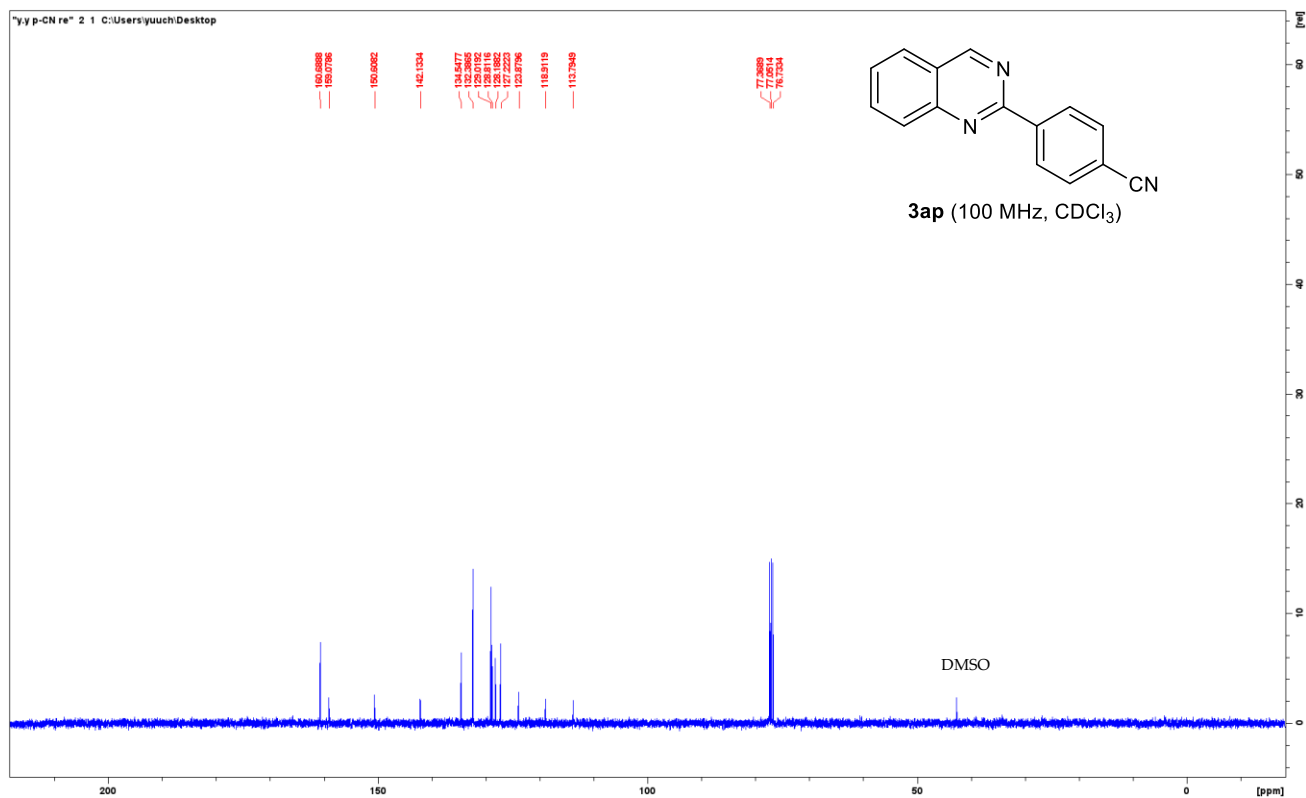

**Figure S17:** Copies of  $^1\text{H}$  and  $^{13}\text{C}\{^1\text{H}\}$  NMR spectra of compound **3aq**

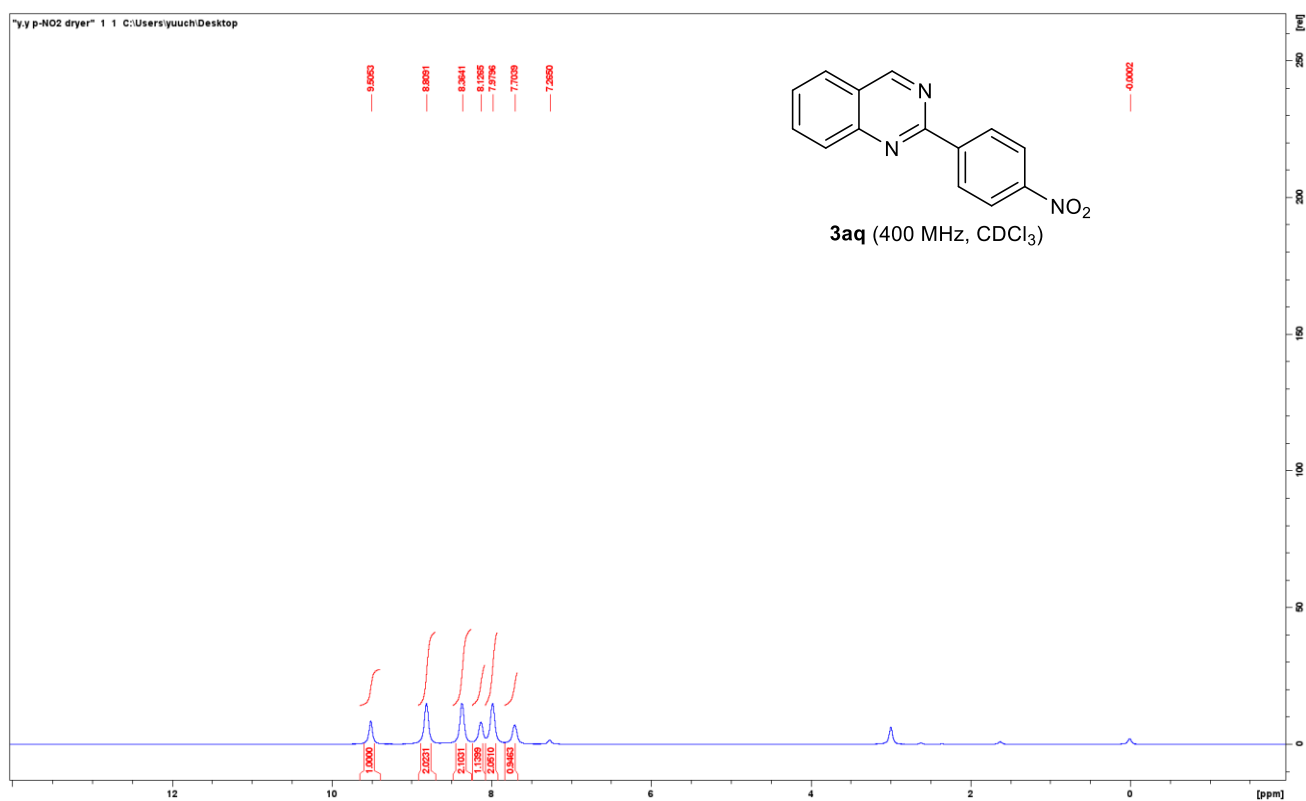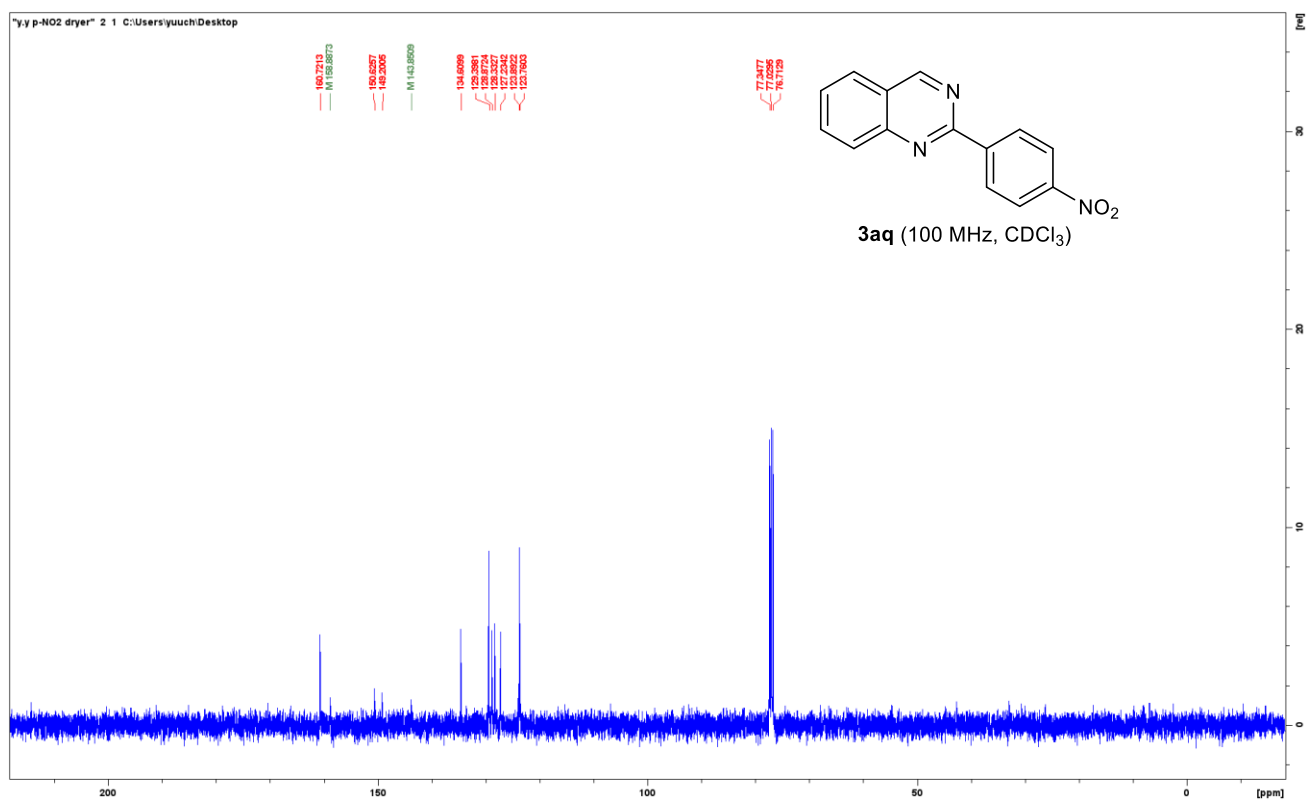

**Figure S18:** Copies of  $^1\text{H}$  and  $^{13}\text{C}\{^1\text{H}\}$  NMR spectra of compound **3ar**

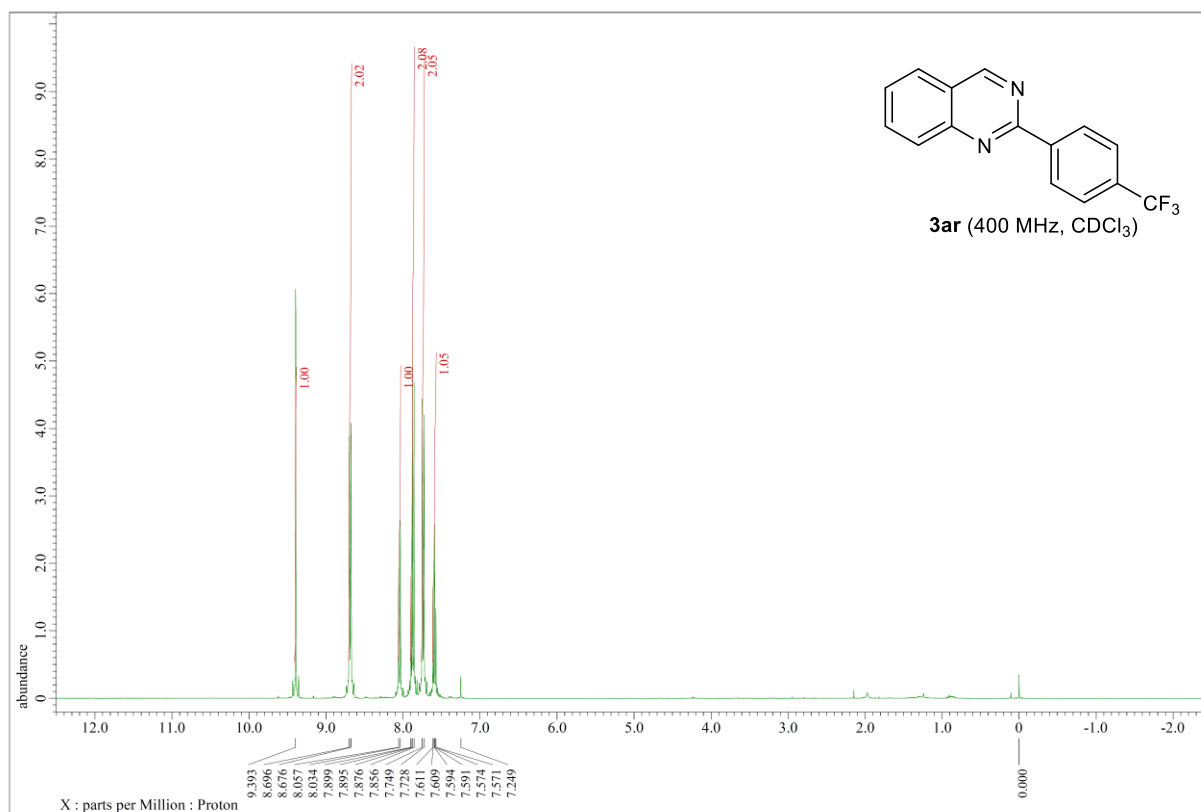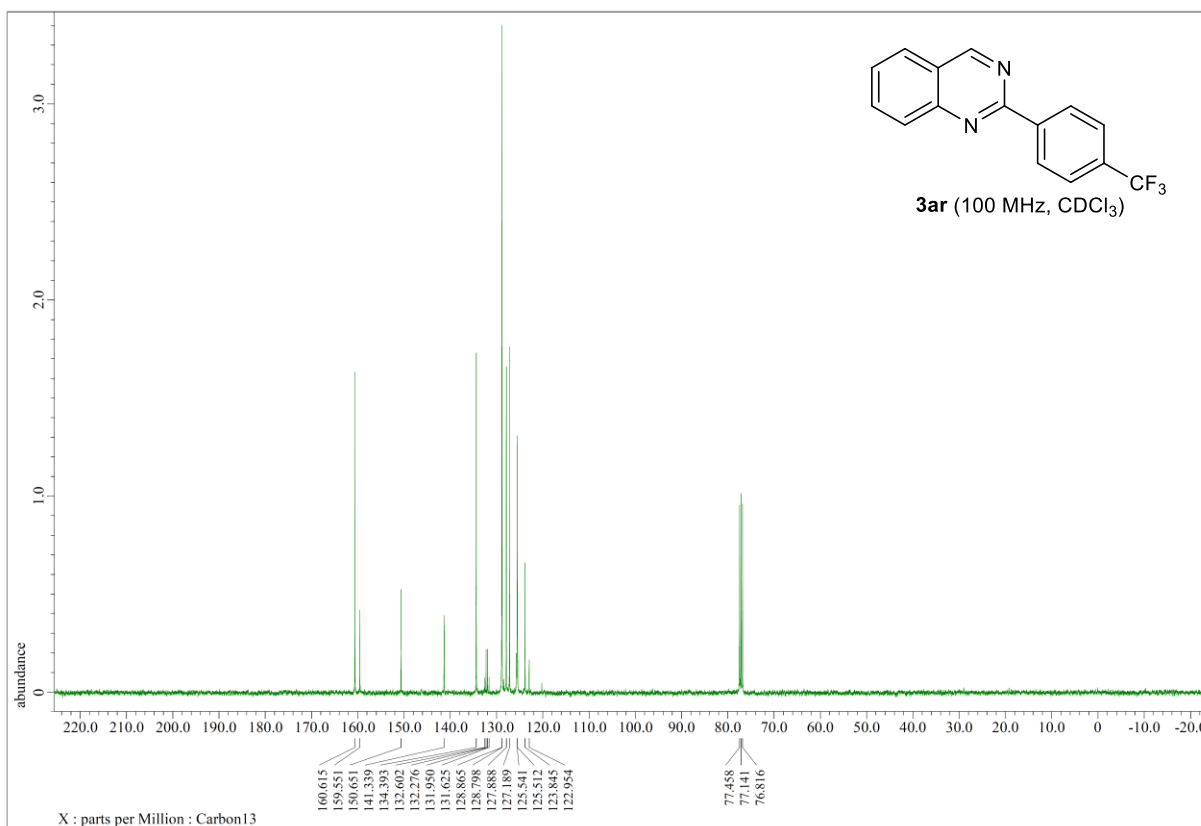

**Figure S19:** Copies of  $^1\text{H}$  and  $^{13}\text{C}\{^1\text{H}\}$  NMR spectra of compound **3as**

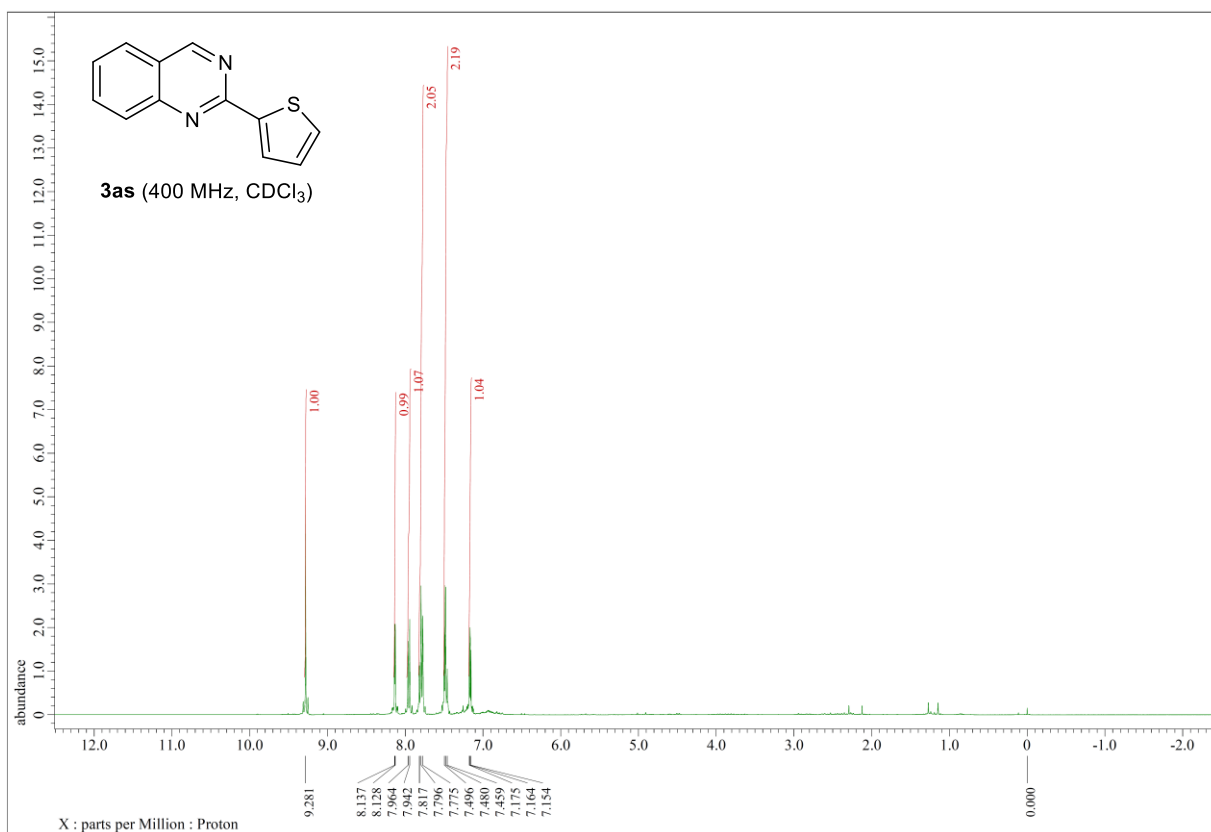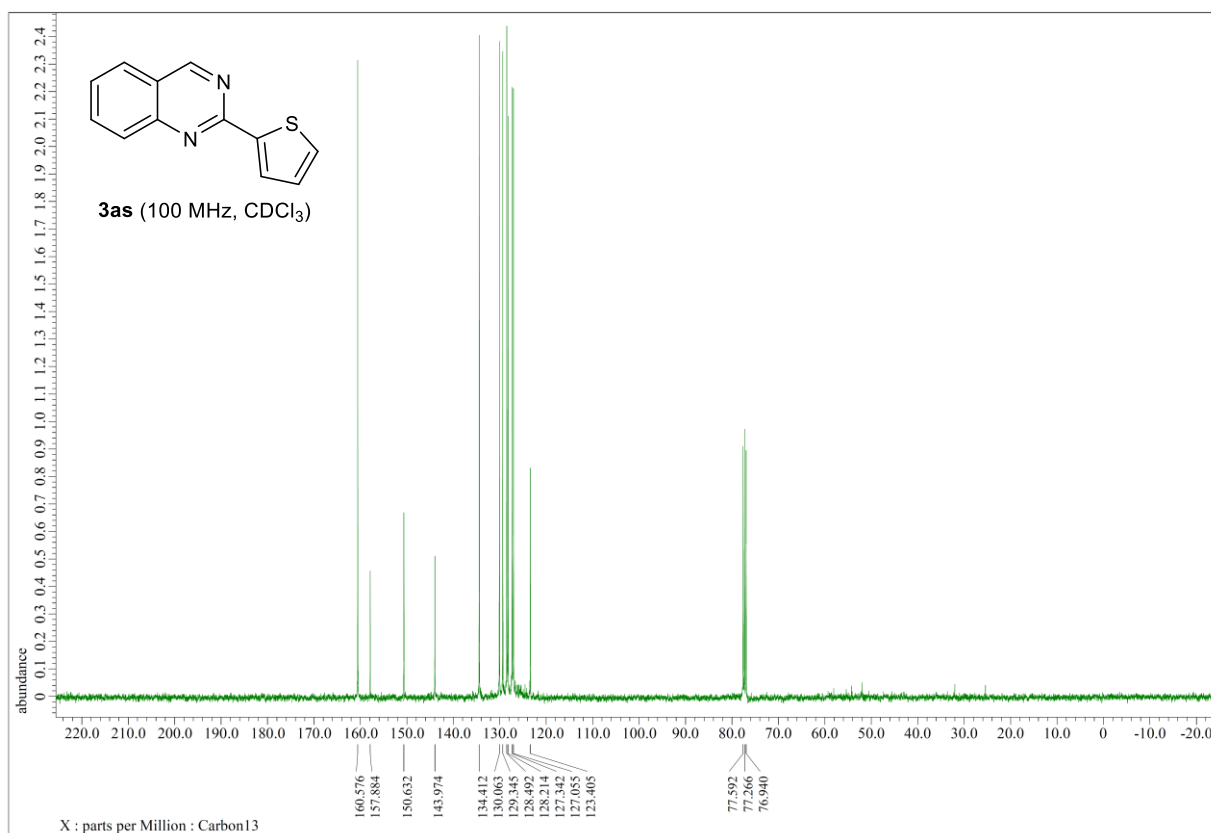



**Figure S21:** Copies of  $^1\text{H}$  and  $^{13}\text{C}\{^1\text{H}\}$  NMR spectra of compound **3ba**

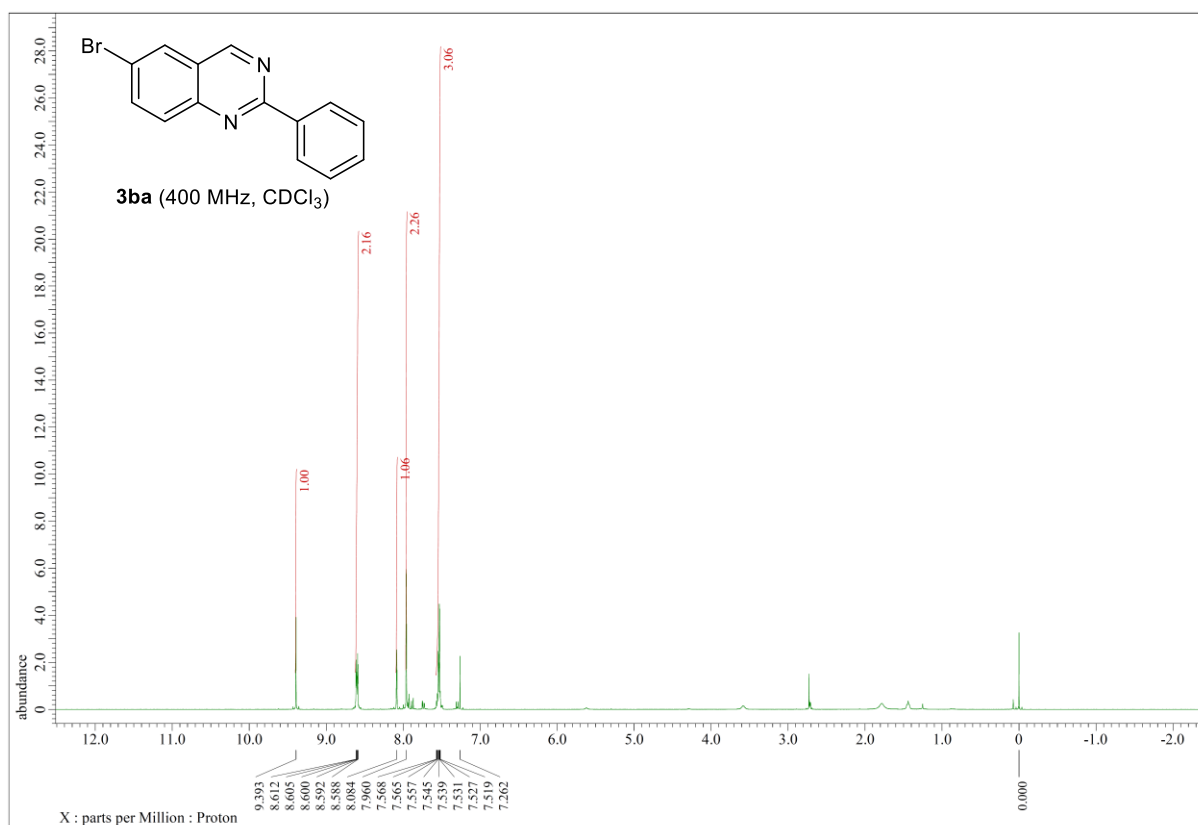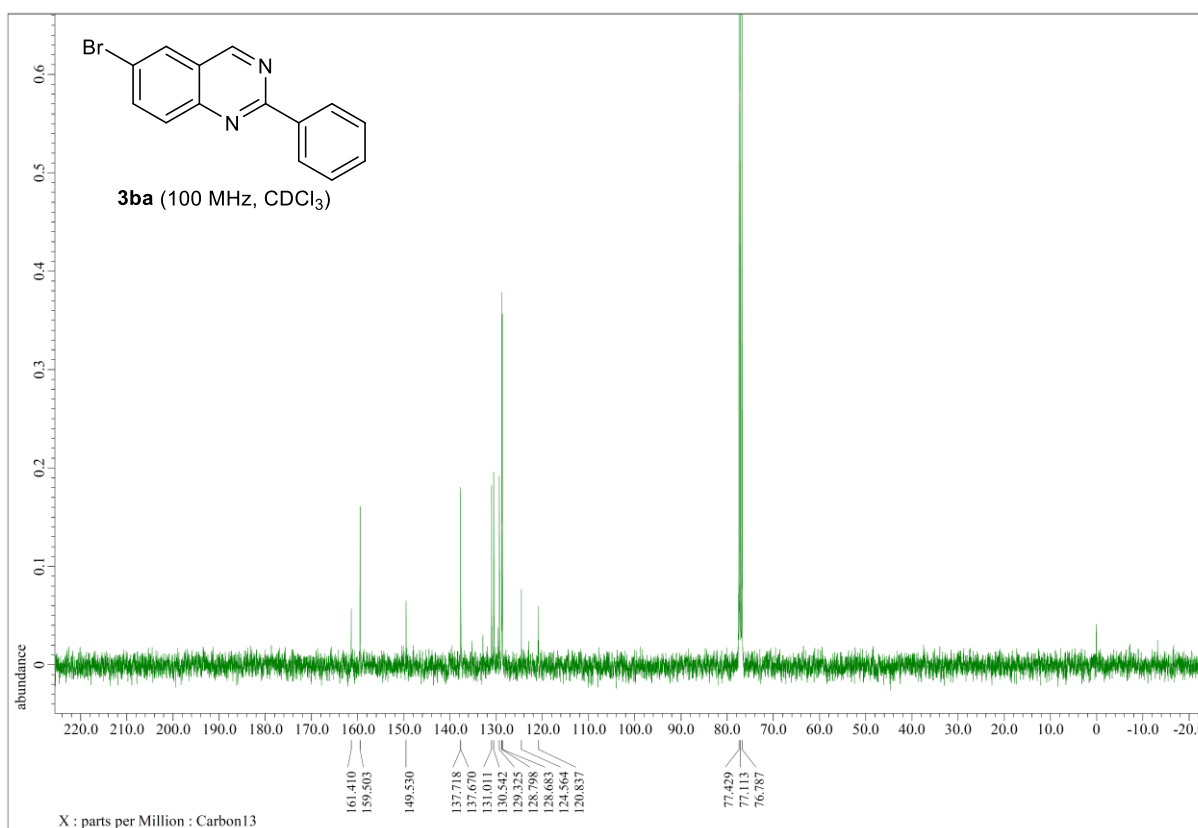

**Figure S22:** Copies of  $^1\text{H}$  and  $^{13}\text{C}\{^1\text{H}\}$  NMR spectra of compound **4a**

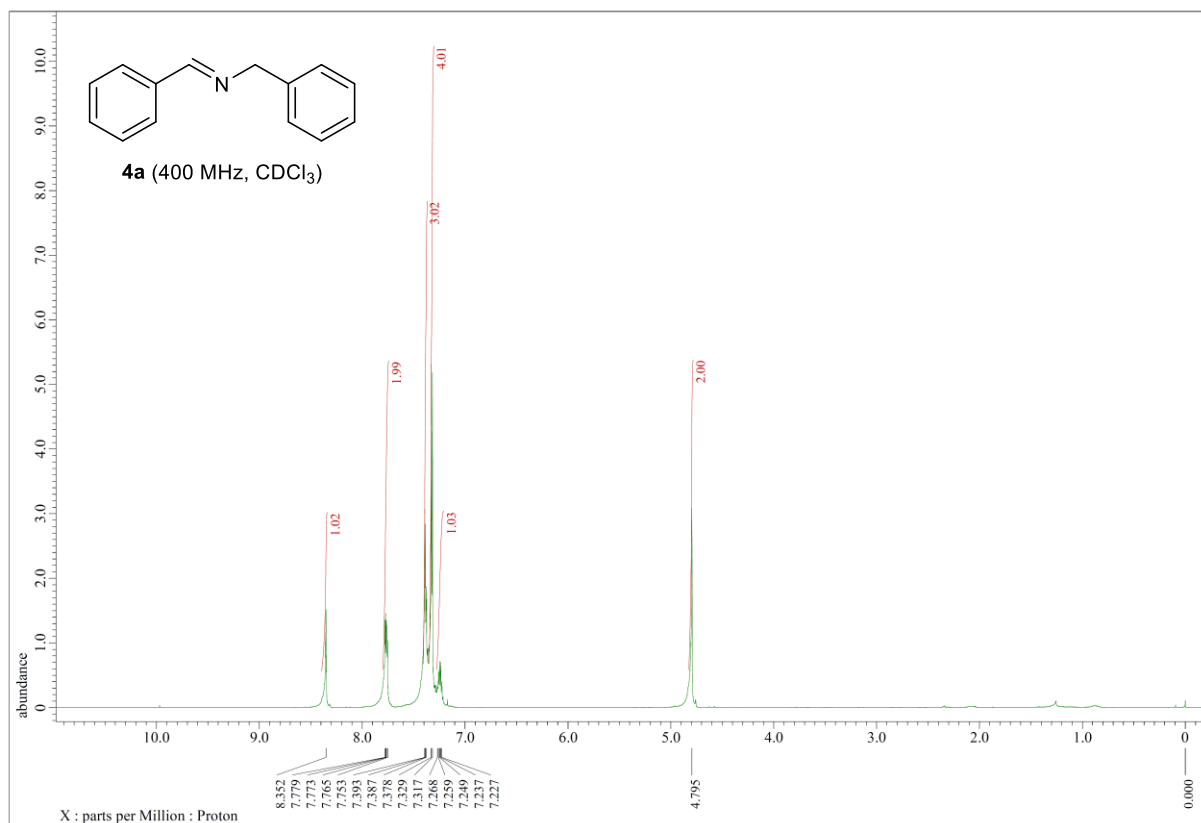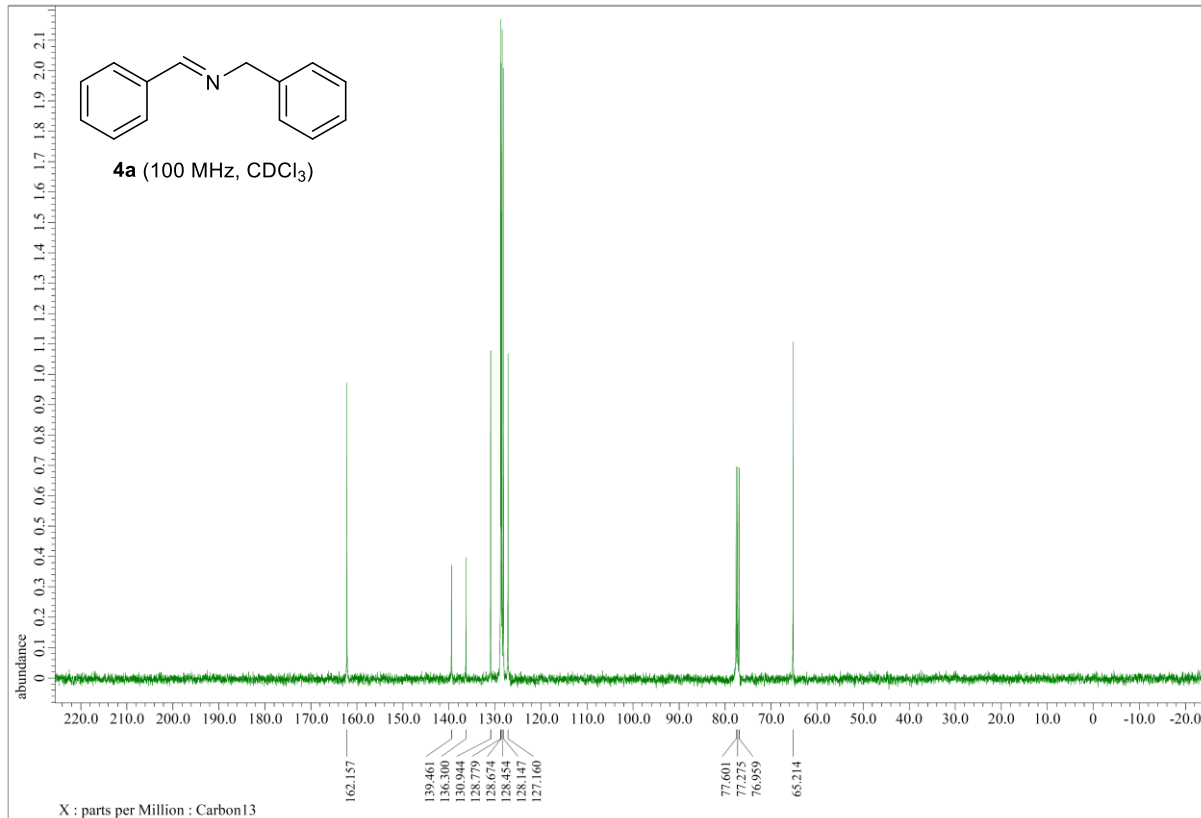



**Figure S23:** Copies of  $^1\text{H}$  and  $^{13}\text{C}\{^1\text{H}\}$  NMR spectra of compound **4b**

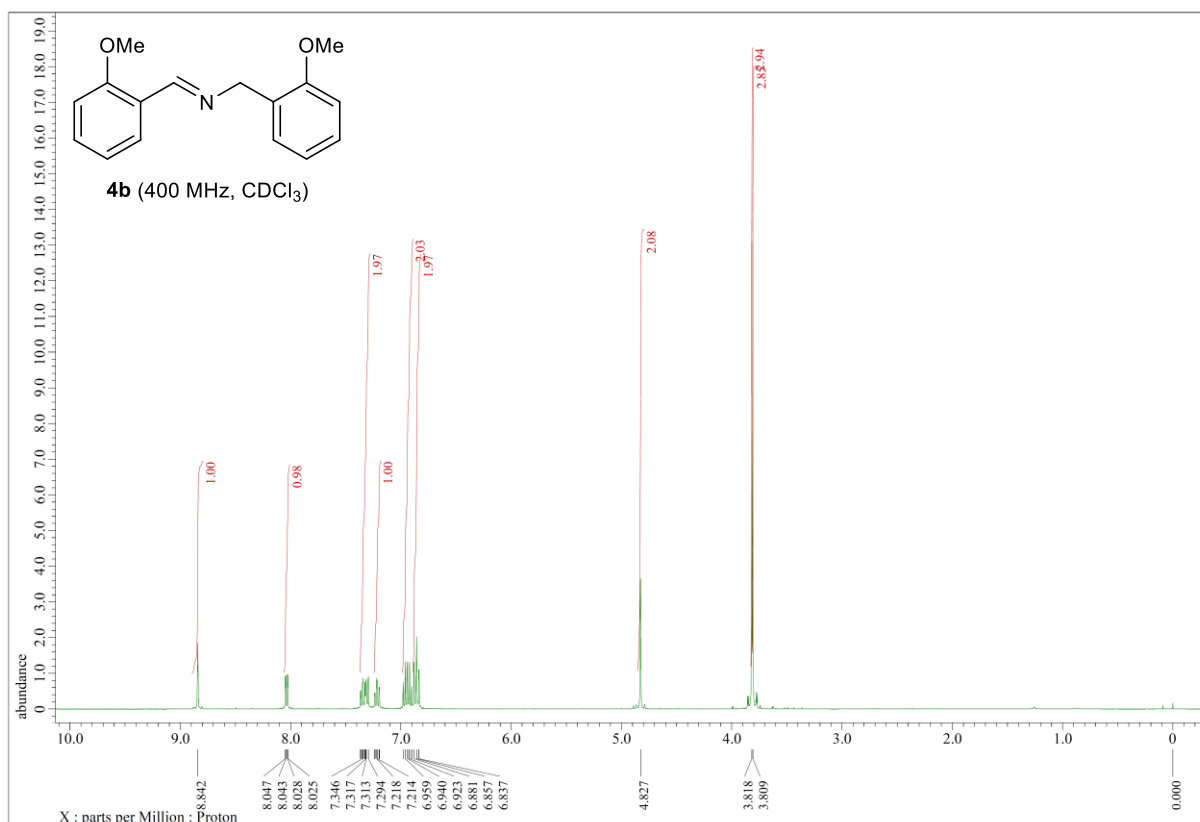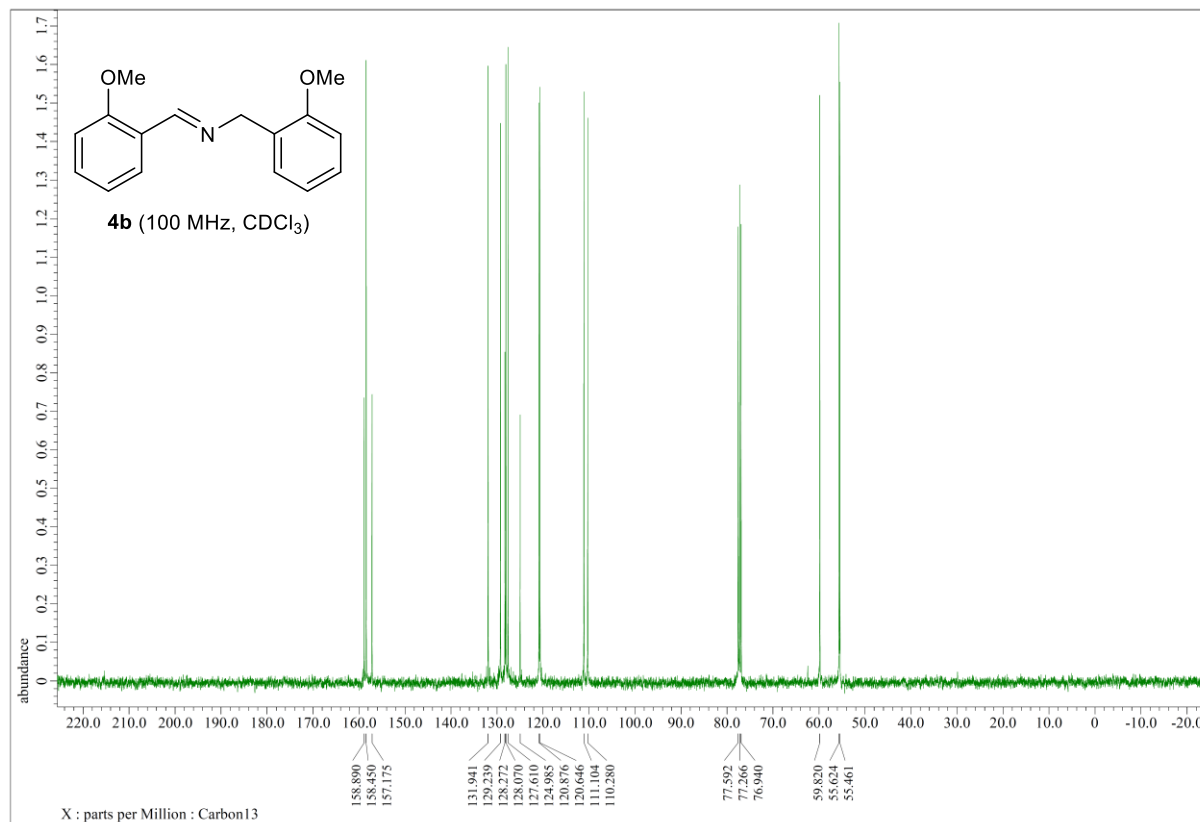

**Figure S24:** Copies of  $^1\text{H}$  and  $^{13}\text{C}\{^1\text{H}\}$  NMR spectra of compound **4c**

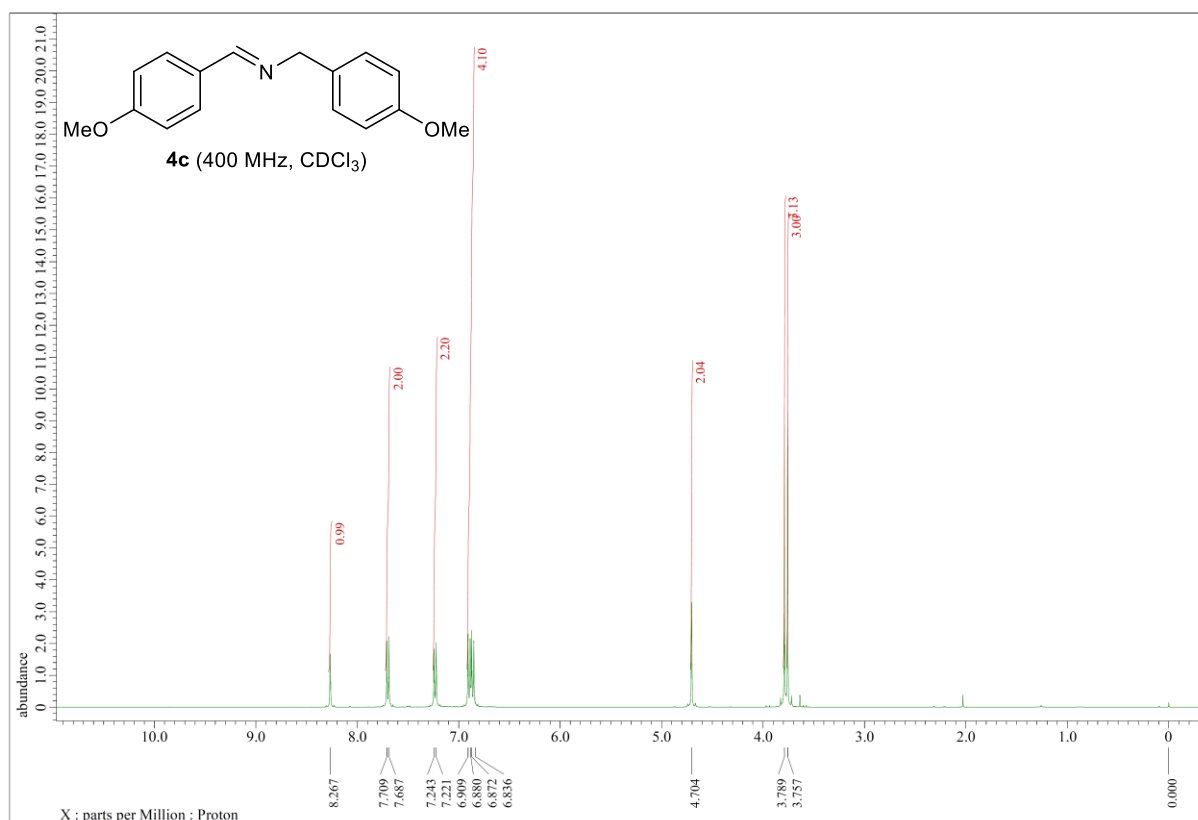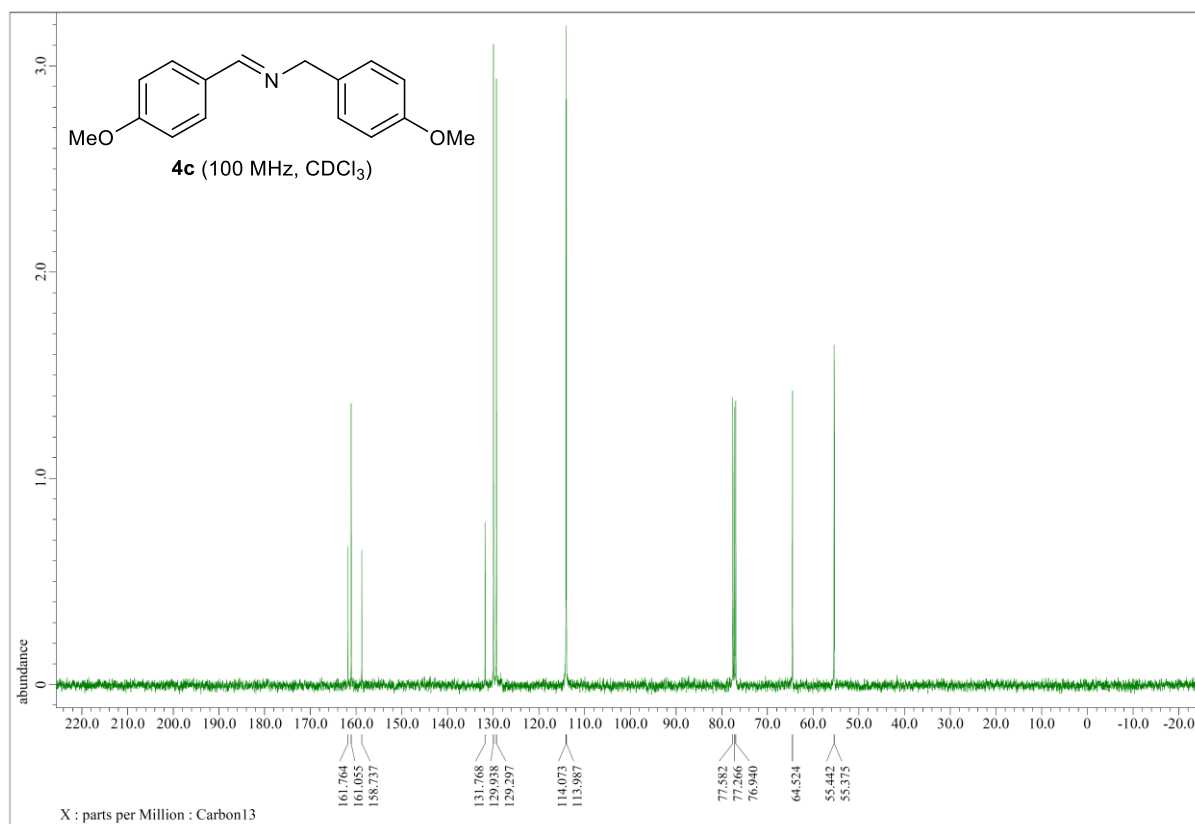

**Figure S25:** Copies of  $^1\text{H}$  and  $^{13}\text{C}\{^1\text{H}\}$  NMR spectra of compound **4d**

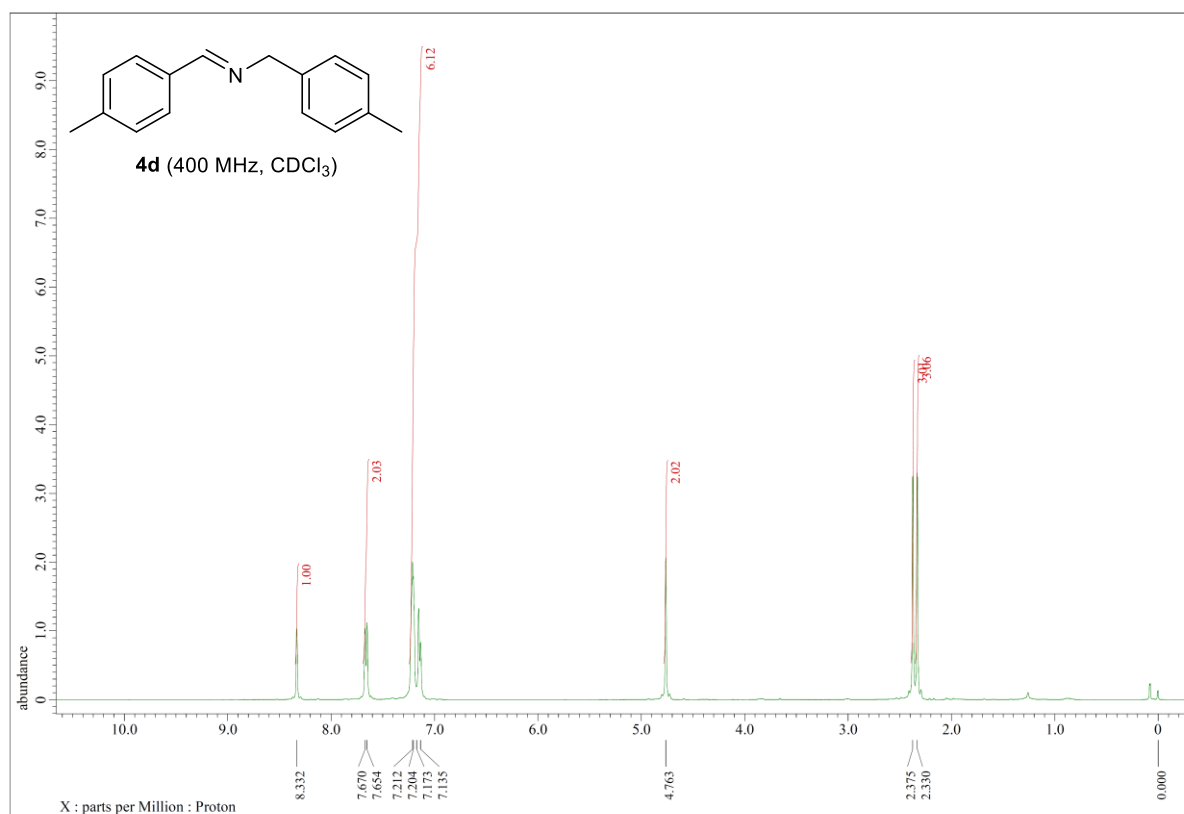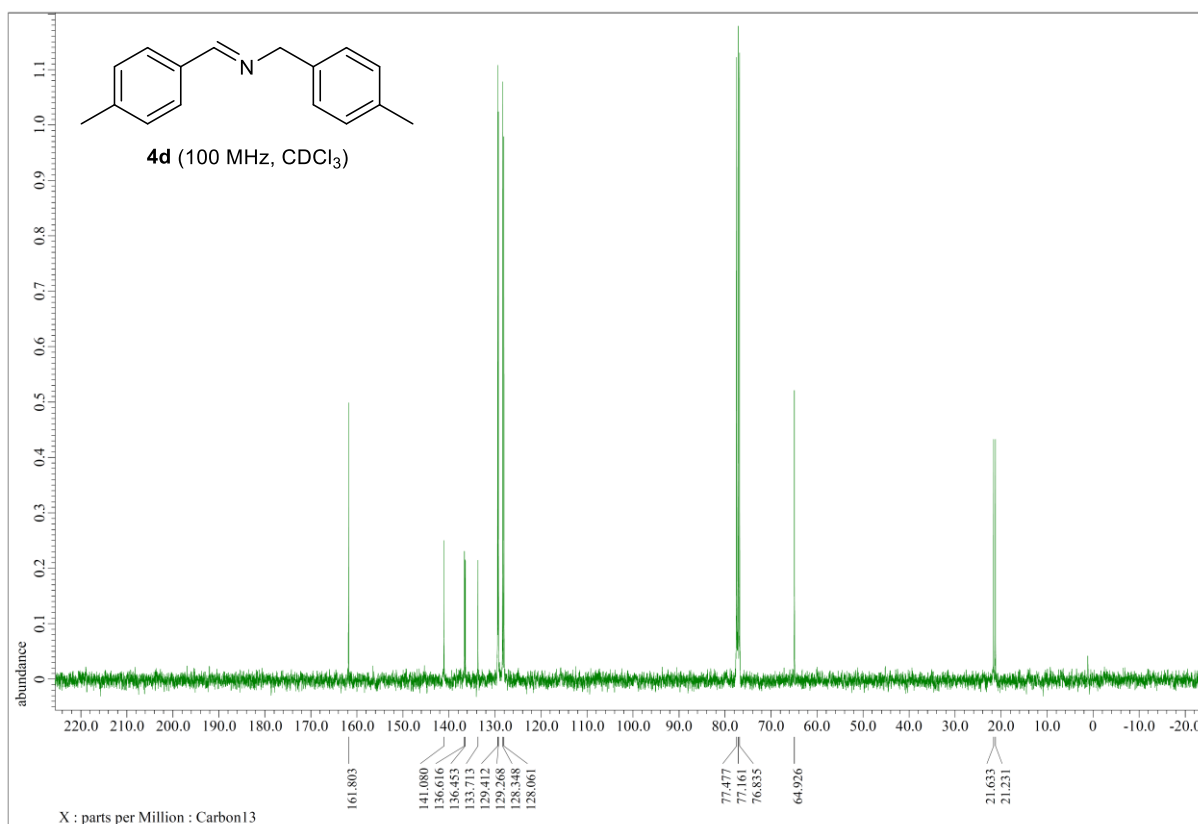

Figure S26: Copies of <sup>1</sup>H and <sup>13</sup>C{<sup>1</sup>H} NMR spectra of compound **6a**

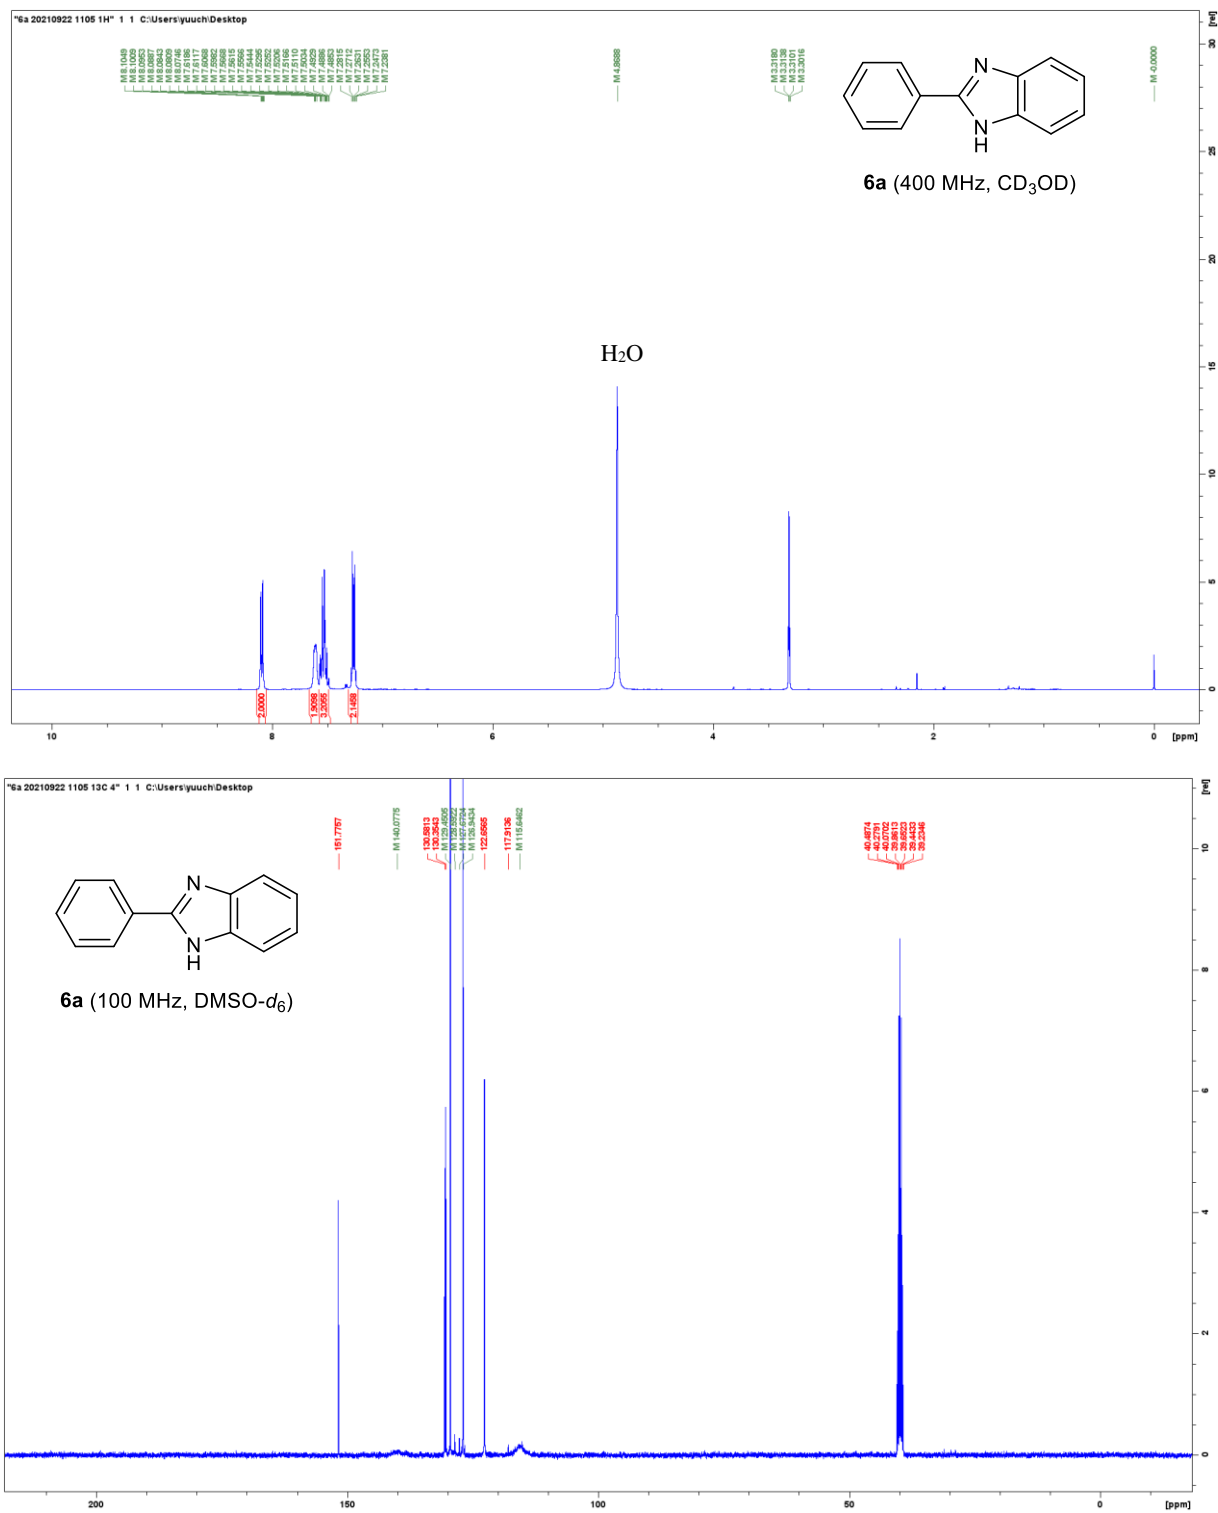

**Figure S27:** Copies of  $^1\text{H}$  and  $^{13}\text{C}\{^1\text{H}\}$  NMR spectra of compound **6b**

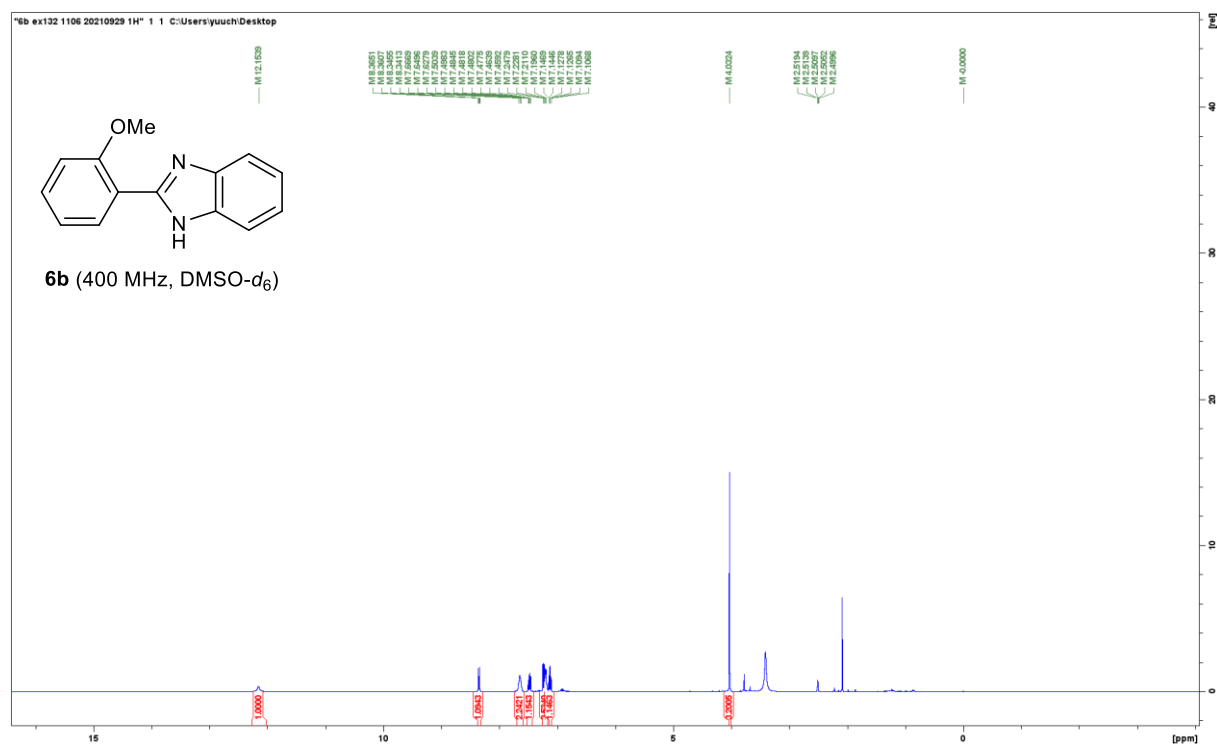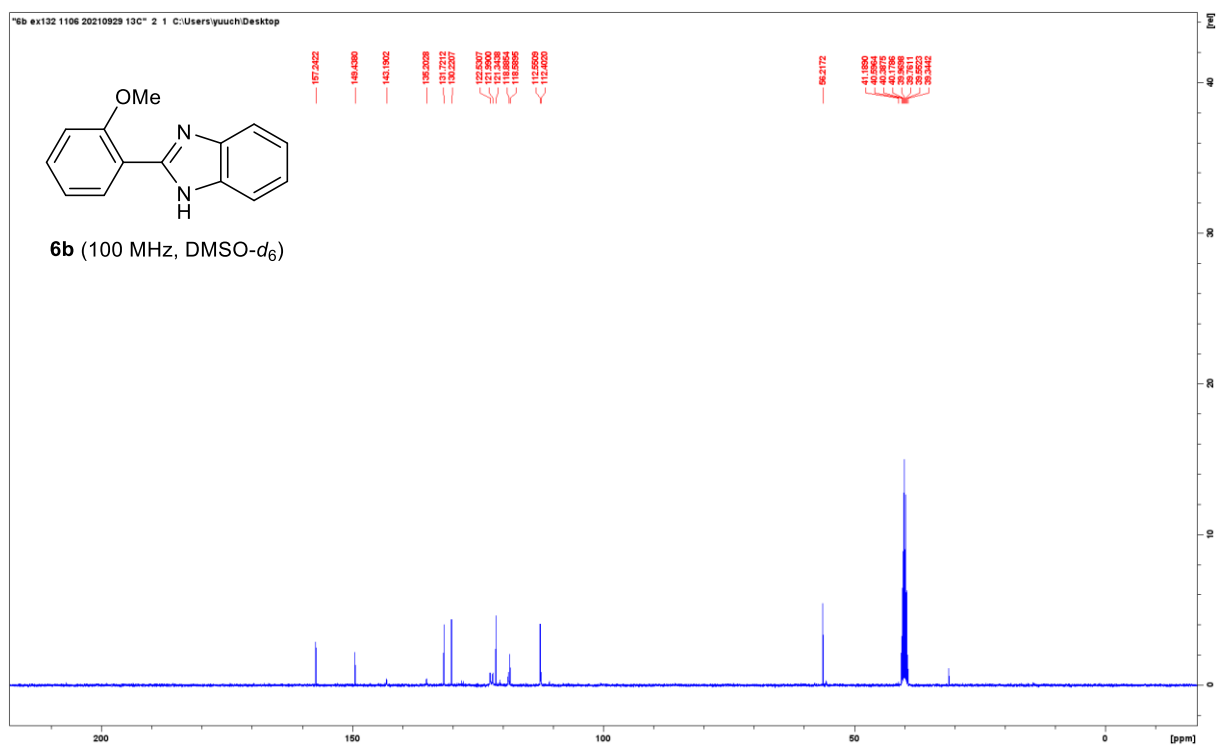

**Figure S28:** Copies of  $^1\text{H}$  and  $^{13}\text{C}\{^1\text{H}\}$  NMR spectra of compound **6c**

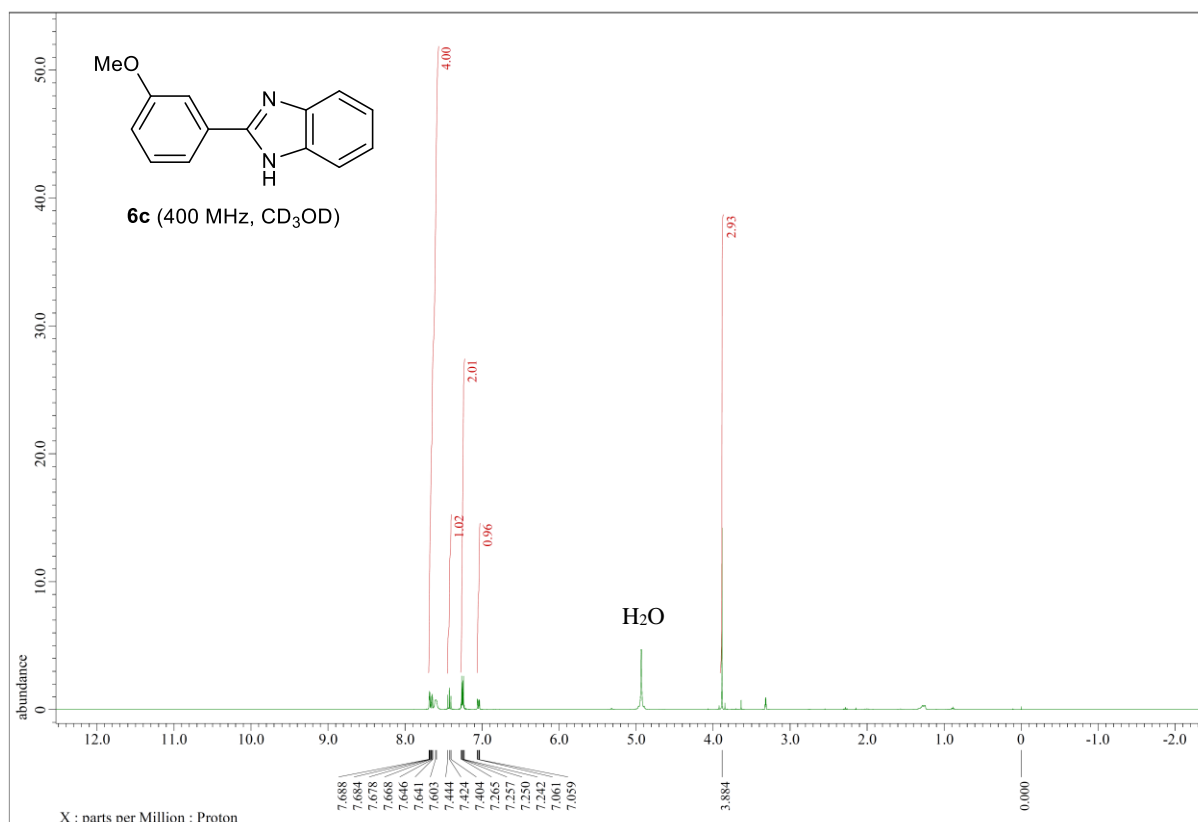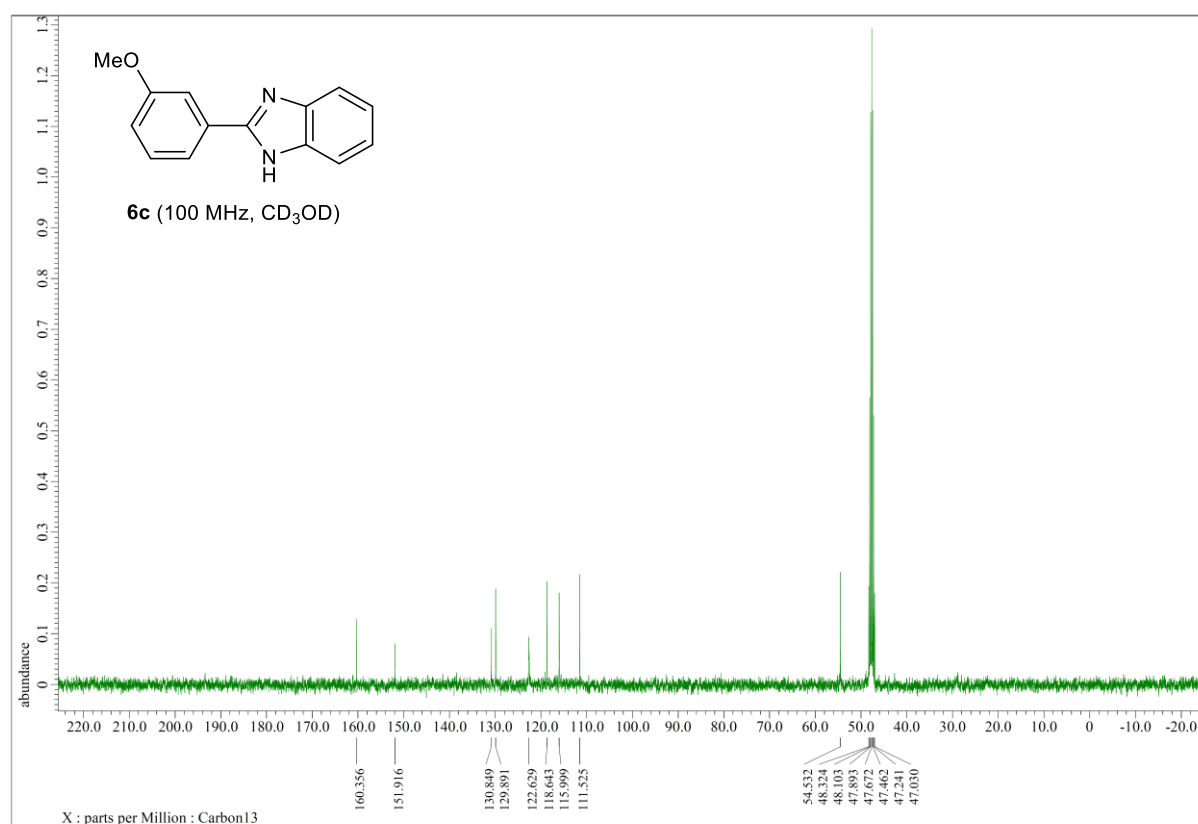

**Figure S29:** Copies of  $^1\text{H}$  and  $^{13}\text{C}\{^1\text{H}\}$  NMR spectra of compound **6d**

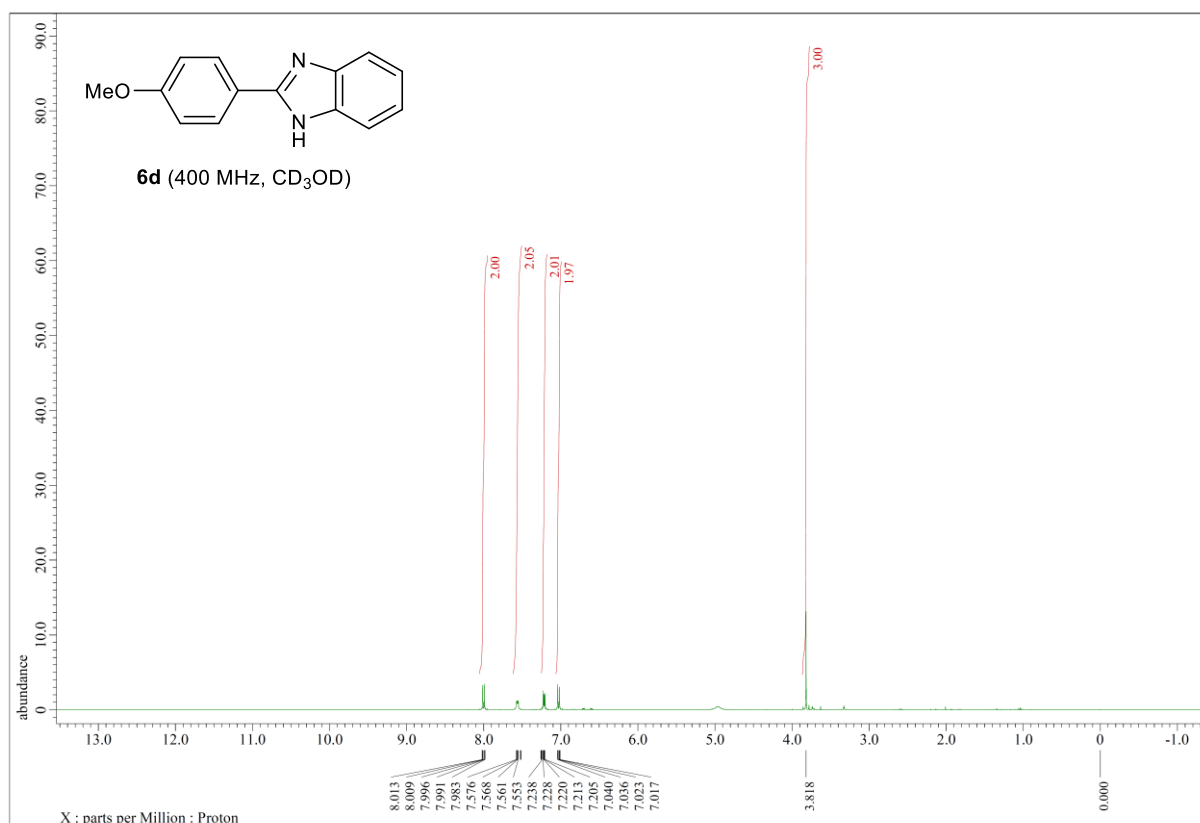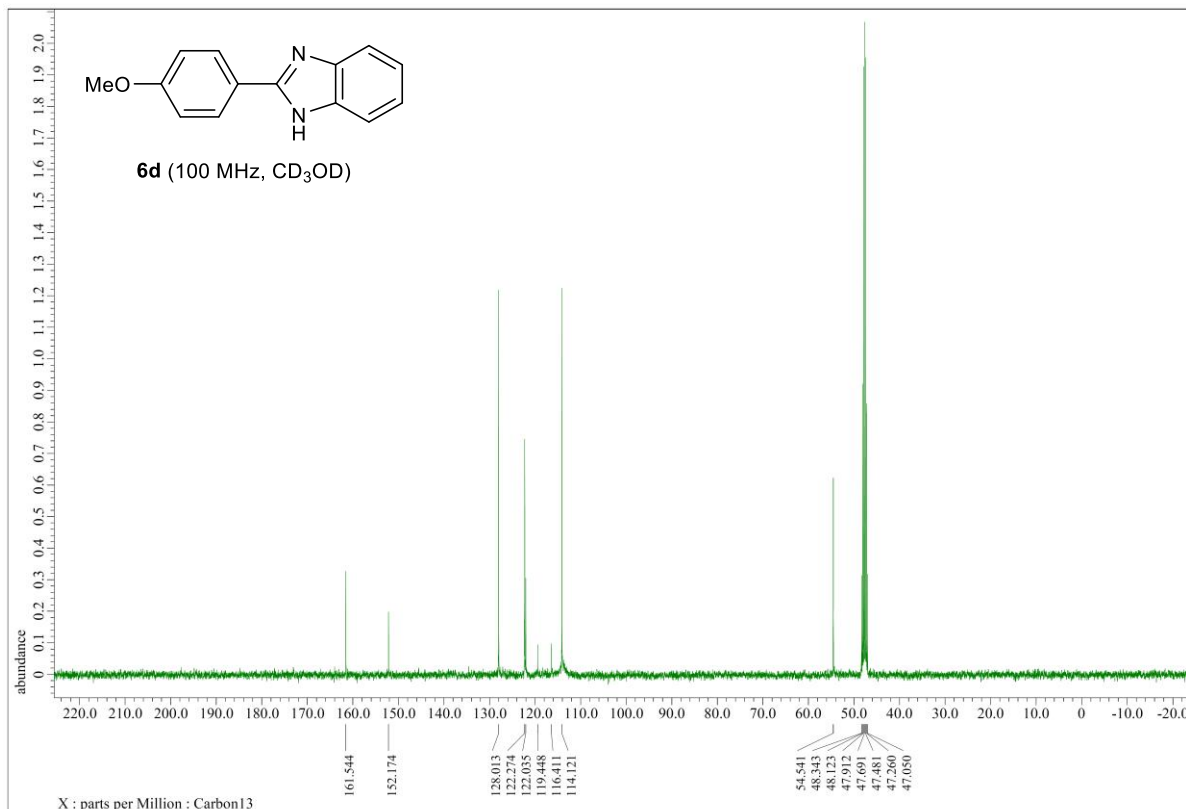

**Figure S30:** Copies of  $^1\text{H}$  and  $^{13}\text{C}\{^1\text{H}\}$  NMR spectra of compound **6e**

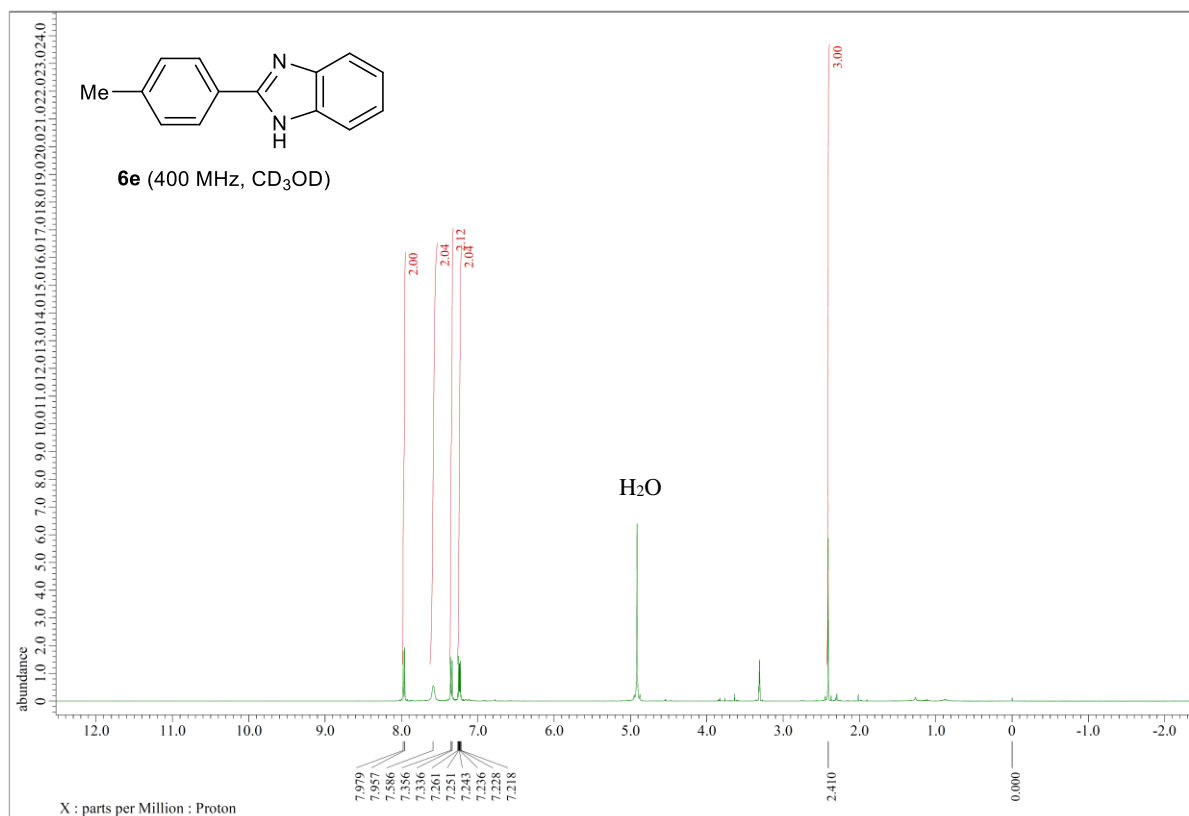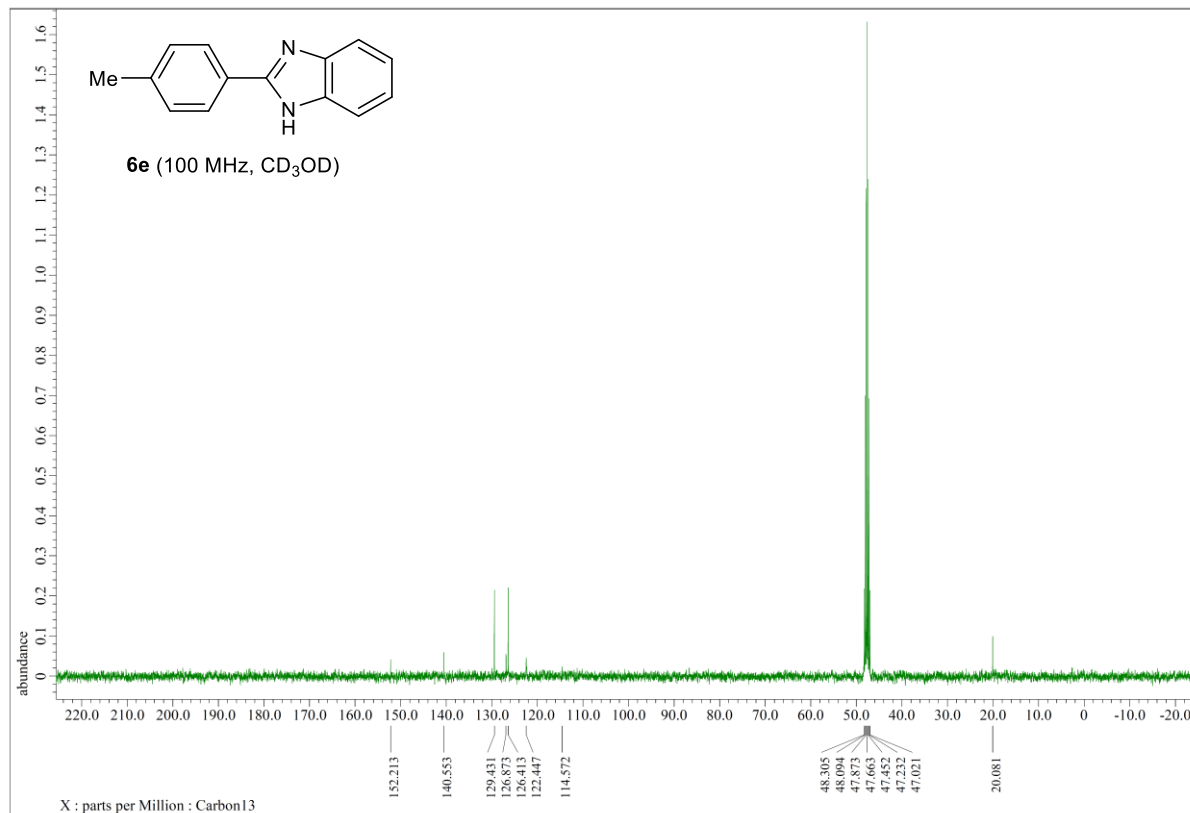



**Figure S31:** Copies of  $^1\text{H}$  and  $^{13}\text{C}\{^1\text{H}\}$  NMR spectra of compound **8**

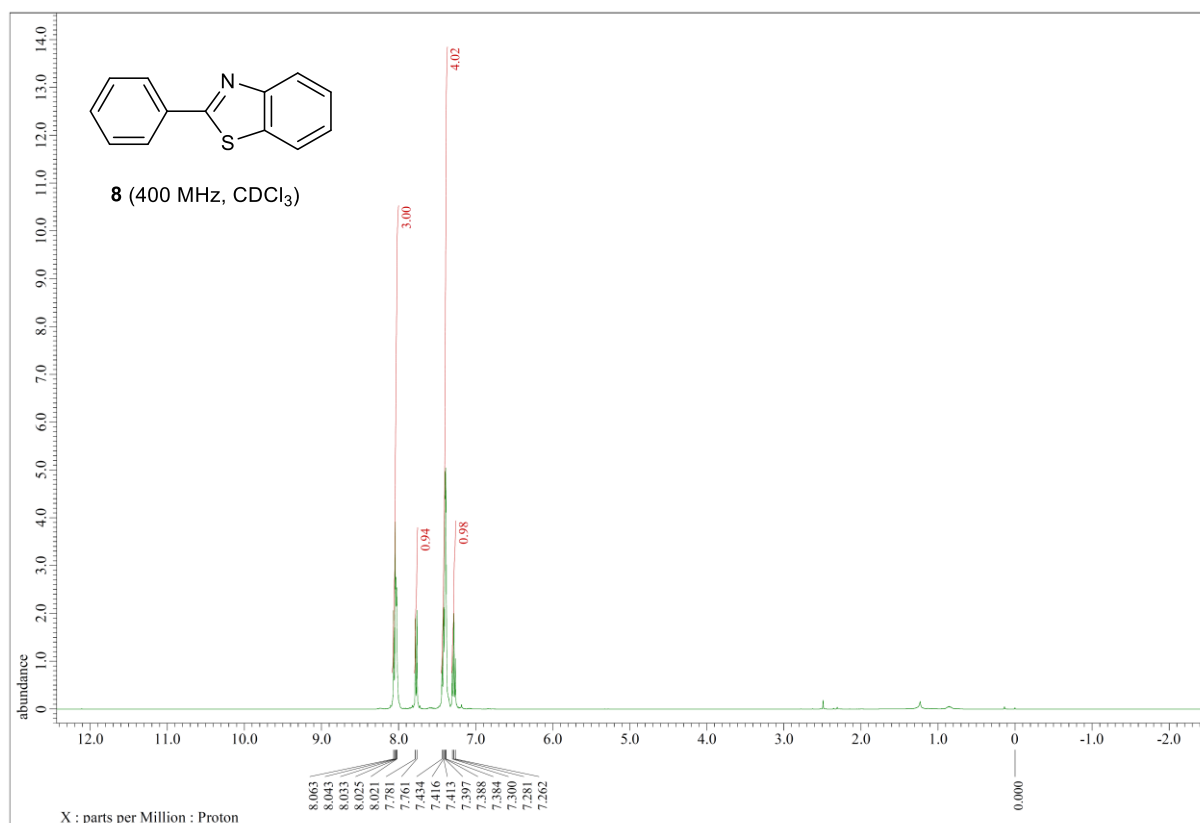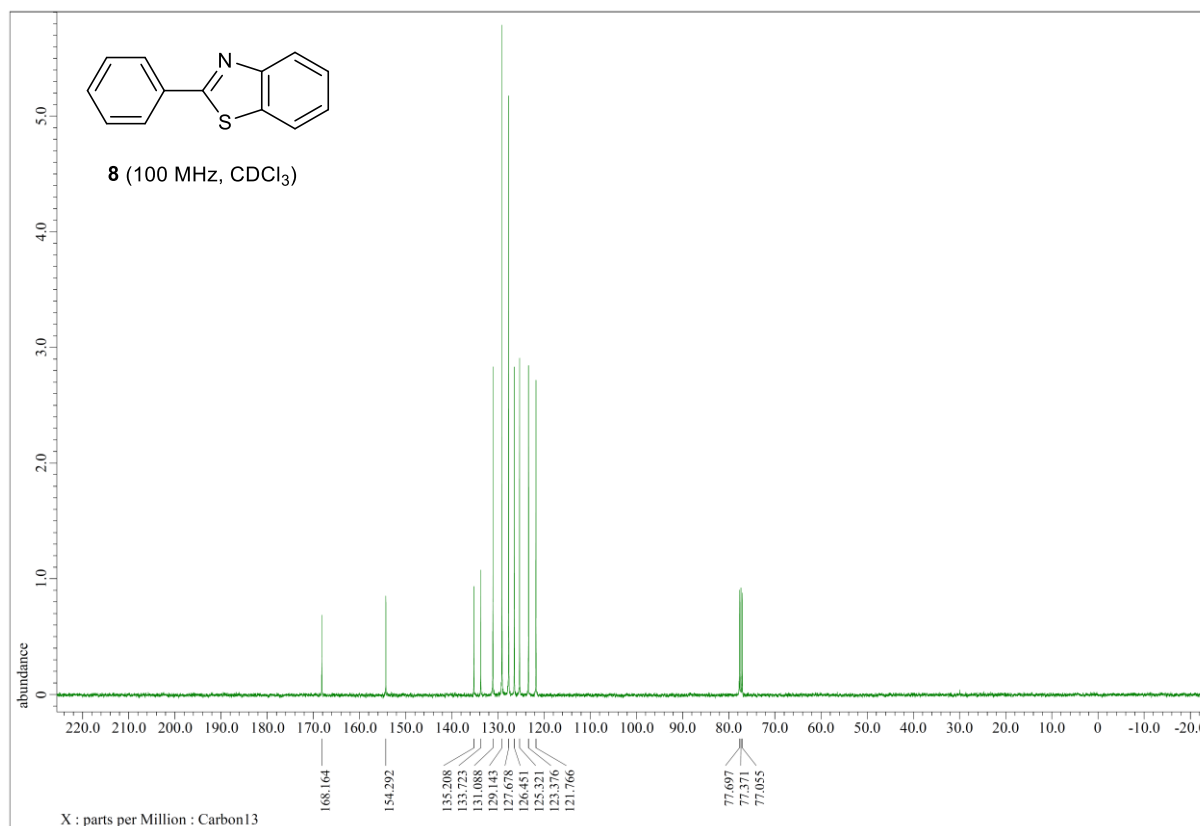

**Figure S32:** Copies of  $^1\text{H}$  and  $^{13}\text{C}\{^1\text{H}\}$  NMR spectra of compound **9**

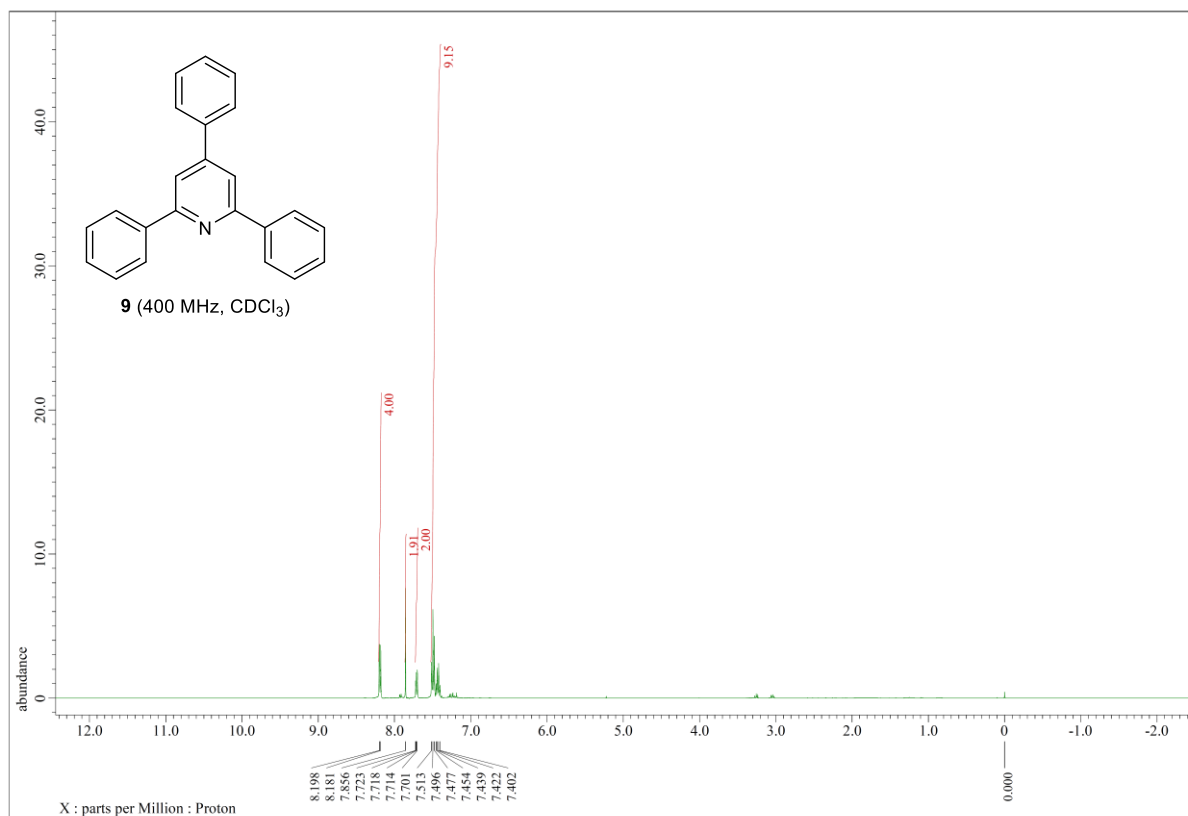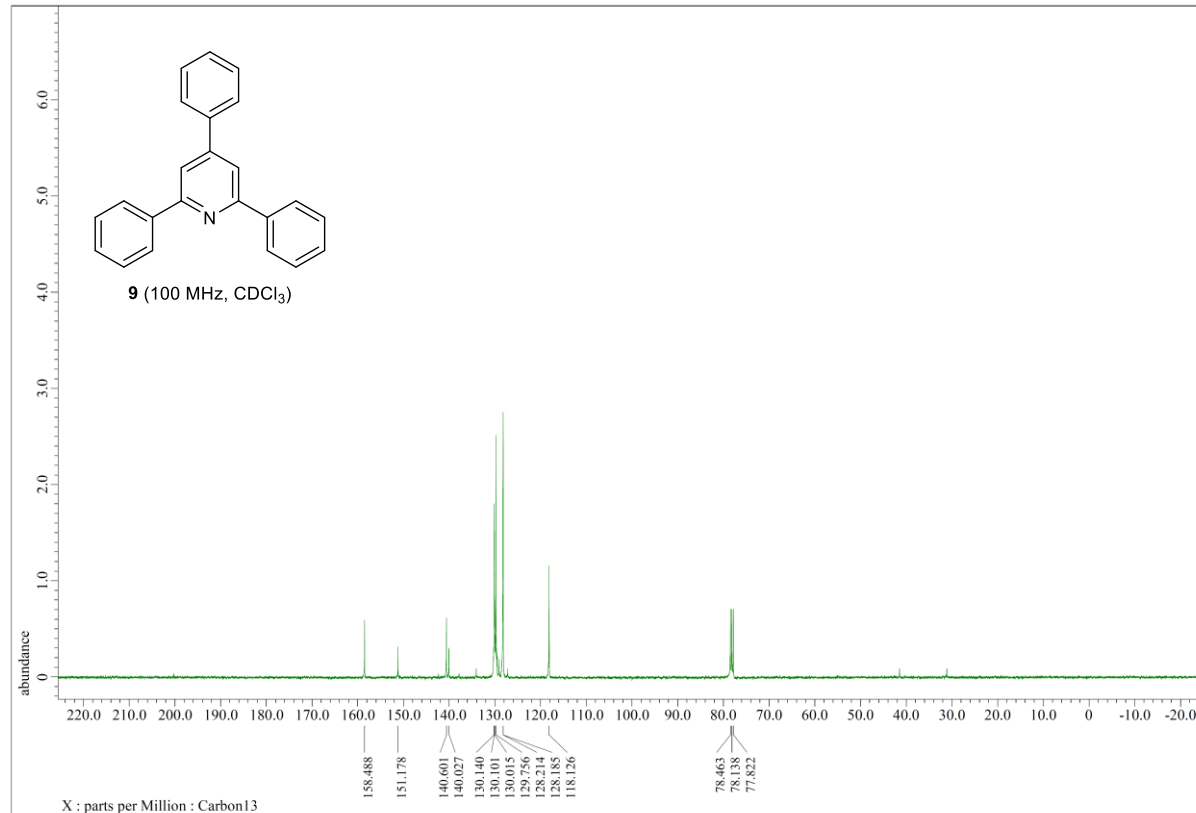

Supplement: DataSheet1.pdf [file DataSheet1.pdf]
